# Supplementary material for: Self-Healing Thiolated Pillar[5]arene Films Containing Moxifloxacin Suppress the Development of Bacterial Biofilms
Source: MDPI journal article supplement (doi:10.3390/nano12091604), 2022-05-09

# Supplementary Materials

## Self-healing Thiolated Pillar[5]arene Films Containing Moxifloxacin Suppress the Development of Bacterial Biofilms

Dmitriy N. Shurpik <sup>1,\*</sup>, Yulia I. Aleksandrova <sup>1</sup>, Olga A. Mostovaya <sup>1</sup>, Viktoriya A. Nazmutdinova <sup>1</sup>, Regina E. Tazieva <sup>1</sup>, Fadis F. Murzakhanov <sup>2</sup>, Marat R. Gafurov <sup>2</sup>, Pavel V. Zelenikhin <sup>3</sup>, Evgenia V. Subakaeva <sup>3</sup>, Evgenia A. Sokolova <sup>3</sup>, Alexander V. Gerasimov <sup>1</sup>, Vadim V. Gorodov <sup>4</sup>, Daut R. Islamov <sup>5</sup>, Peter J. Cragg <sup>6</sup> and Ivan I. Stoikov <sup>1,\*</sup>

<sup>1</sup> A.M.Butlerov Chemical Institute, Kazan Federal University, Kremlevskaya, 18, 420008 Kazan, Russia; a.julia.1996@mail.ru (Y.I.A.); olga.mostovaya@mail.ru (O.A.M.); n-vika-art@mail.ru (V.A.N.); reginatzv@gmail.com (R.E.T.); alexander.gerasimov@kpfu.ru (A.V.G.)

<sup>2</sup> Institute of Physics, Kazan Federal University, Kremlevskaya, 18, 420008 Kazan, Russia; murzakhanov.fadis@yandex.ru (F.F.M.); marat.gafurov@kpfu.ru (M.R.G.)

<sup>3</sup> Institute of Fundamental Medicine and Biology, Kazan Federal University, Kremlevskaya, 18, 420008 Kazan, Russia; pasha\_mic@mail.ru (P.V.Z.); zs\_zs97@mail.ru (E.V.S.); zhenya\_mic@mail.ru (E.A.S.)

<sup>4</sup> Enikolopov Institute of Synthetic Polymeric Materials Russian Academy of Sciences (ISPM RAS), Profsoyuznaya, 70, 117393 Moscow, Russia; gorodovvv@ispm.ru

<sup>5</sup> Laboratory for Structural Analysis of Biomacromolecules, Kazan Scientific Center of Russian Academy of Sciences, Lobachevskogo, 2/31, 420111 Kazan, Russia; daut1989@mail.ru

<sup>6</sup> School of Applied Sciences, University of Brighton, Huxley Building, Brighton, East Sussex BN2 4GJ, UK; p.j.cragg@brighton.ac.uk

\* Correspondence: dnshurpik@mail.ru (D.N.S.); ivan.stoikov@mail.ru (I.I.S.)

|                                                                          |    |
|--------------------------------------------------------------------------|----|
| 1. Materials and methods .....                                           | 2  |
| 2. NMR, MALDI TOF MS, IR spectra of the compounds 2, 3, 3/3S, 3/4S ..... | 3  |
| 3. NMR study .....                                                       | 10 |
| 4. Dynamic light scattering .....                                        | 11 |
| 5. UV-vis study .....                                                    | 15 |
| 6. Chromatographic study of 3/3S, 3/4S, (3S)n, (4S)n. ....               | 18 |
| 8. Thermal Gravimetric Analysis of 3, 3n, 3/3S, 3/4S .....               | 19 |
| 9. Morphology and Composition of 3/3Sn, 3/4Sn .....                      | 21 |
| 9.1. Transmission Electron Microscopy .....                              | 21 |
| 9.2. Scanning Electron Microscopy .....                                  | 22 |
| 9.3 Atomic Force Microscopy .....                                        | 25 |
| 9.4 Optical Microscopy .....                                             | 25 |
| 10. EPR study .....                                                      | 26 |

## Materials and methods

**Table S1.** Variation of the conditions for the oxidative oligomerization of the macrocycle **3**, **3S** and **4S**.

| <b>№</b>  | <b>mass ratio of reagents 3/3S</b> | <b>t, °C</b> | <b>solvent</b>     | <b>cat</b>                        | <b>t, hour</b> | <b>Yield oligomerization product 3/3S, %</b> |
|-----------|------------------------------------|--------------|--------------------|-----------------------------------|----------------|----------------------------------------------|
| 1         | 1:1                                | 25           | THF                | H <sub>2</sub> O <sub>2</sub>     | 24             | 15                                           |
| 2         | 1:3                                | 25           | THF                | H <sub>2</sub> O <sub>2</sub>     | 24             | 53                                           |
| <b>3</b>  | <b>1:5</b>                         | <b>25</b>    | <b>THF</b>         | <b>H<sub>2</sub>O<sub>2</sub></b> | <b>24</b>      | <b>70</b>                                    |
| 4         | 1:10                               | 25           | THF                | H <sub>2</sub> O <sub>2</sub>     | 24             | 60                                           |
| 5         | 1:5                                | 25           | CH <sub>3</sub> CN | I <sub>2</sub>                    | 7              | 15                                           |
| 6         | 1:5                                | 25           | -                  | H <sub>2</sub> O <sub>2</sub>     | 48             | 9                                            |
| 7         | 1:5                                | 75           | THF                | I <sub>2</sub>                    | 36             | 24                                           |
| 8         | 1:5                                | 0            | DMF                | I <sub>2</sub>                    | 10             | -                                            |
| 9         | 1:10                               | 25           | -                  | I <sub>2</sub>                    | 26             | -                                            |
| 10        | 1:5                                | 25           | THF                | FeCl <sub>3</sub>                 | 42             | 31                                           |
| <b>№</b>  | <b>mass ratio of reagents 3/4S</b> | <b>t, °C</b> | <b>solvent</b>     | <b>cat</b>                        | <b>t, hour</b> | <b>Yield oligomerization product 3/4S, %</b> |
| 11        | 1:1                                | 25           | THF                | H <sub>2</sub> O <sub>2</sub>     | 24             | 12                                           |
| 12        | 1:3                                | 25           | THF                | H <sub>2</sub> O <sub>2</sub>     | 24             | 55                                           |
| <b>13</b> | <b>1:5</b>                         | <b>25</b>    | <b>THF</b>         | <b>H<sub>2</sub>O<sub>2</sub></b> | <b>24</b>      | <b>76</b>                                    |
| 14        | 1:10                               | 25           | THF                | H <sub>2</sub> O <sub>2</sub>     | 24             | 59                                           |
| 15        | 1:5                                | 25           | CH <sub>3</sub> CN | I <sub>2</sub>                    | 7              | 3                                            |
| 16        | 1:5                                | 25           | -                  | H <sub>2</sub> O <sub>2</sub>     | 48             | 6                                            |
| 17        | 1:5                                | 75           | THF                | I <sub>2</sub>                    | 36             | 27                                           |
| 18        | 1:5                                | 0            | DMF                | I <sub>2</sub>                    | 10             | -                                            |
| 19        | 1:10                               | 25           | -                  | I <sub>2</sub>                    | 26             | -                                            |
| 20        | 1:5                                | 25           | THF                | FeCl <sub>3</sub>                 | 42             | 25                                           |

## 2. NMR, MALDI TOF MS, IR spectra of the compounds 2, 3, 3/3S, 3/4S

**Figure S1.**  $^1\text{H}$  NMR spectrum of 4,8,14,18,23,26,28,31,32,35 – deca-[acylthioethoxy]-pillar[5]arene (2).  $\text{CDCl}_3$ , 298 K, 400 MHz.

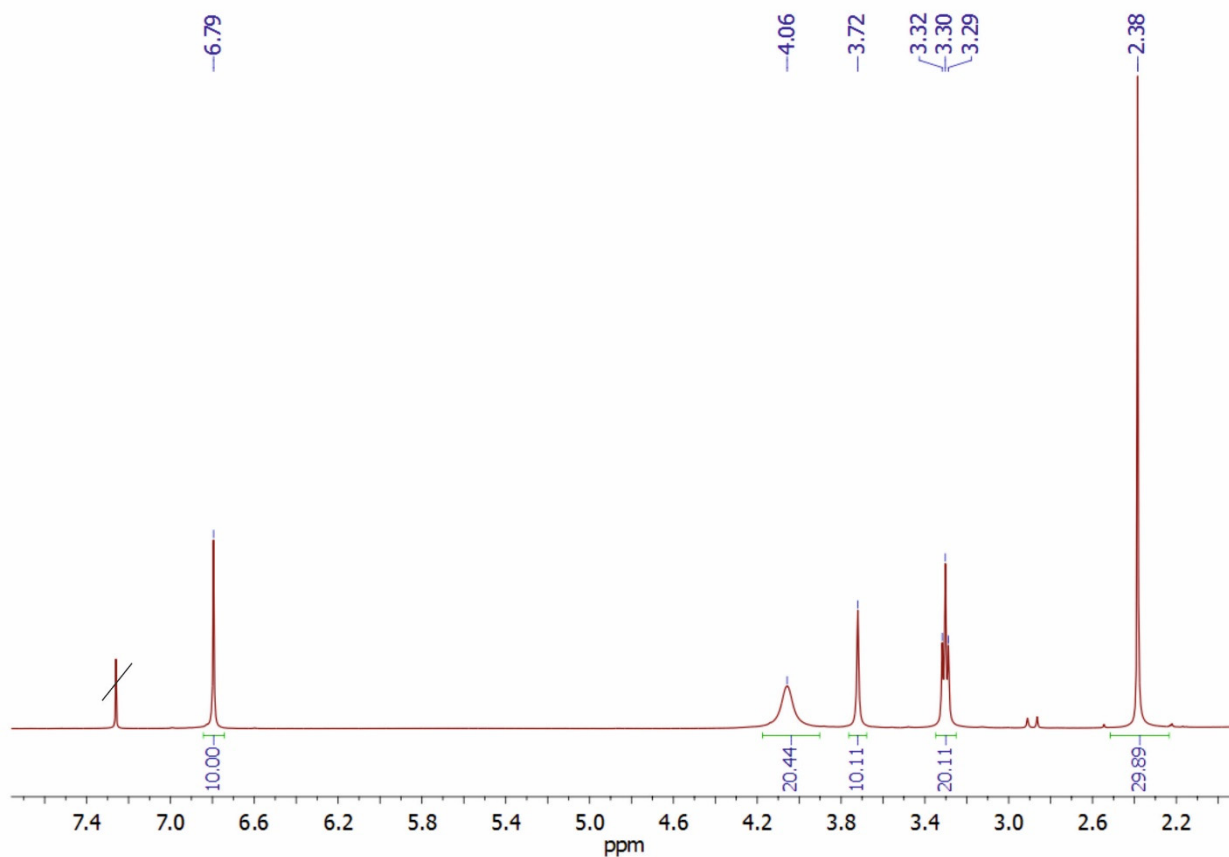

**Figure S2.**  $^1\text{H}$  NMR spectrum of 4,8,14,18,23,26,28,31,32,35 – deca-[2-mercaptoethoxy]-pillar[5]arene (3).  $\text{CDCl}_3$ , 298 K, 400 MHz.

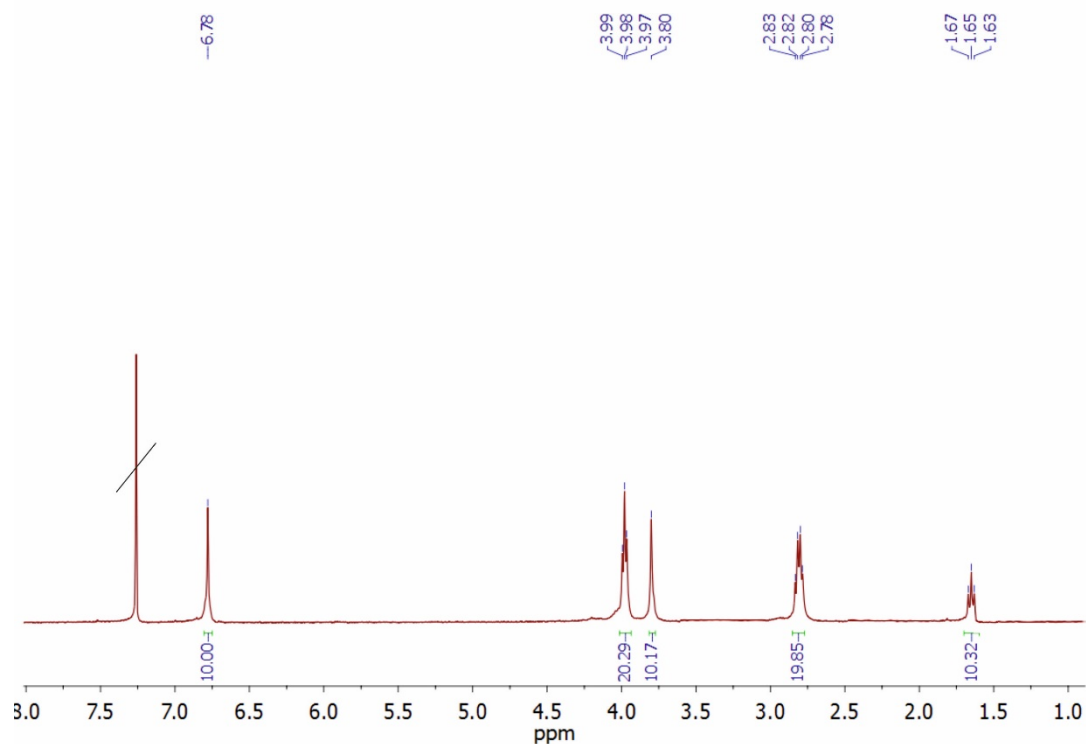

**Figure S3.**  $^{13}\text{C}$  NMR spectrum of 4,8,14,18,23,26,28,31,32,35 – deca-[acylthioethoxy]-pillar[5]arene (2).  $\text{CDCl}_3$ , 298 K, 400 MHz.

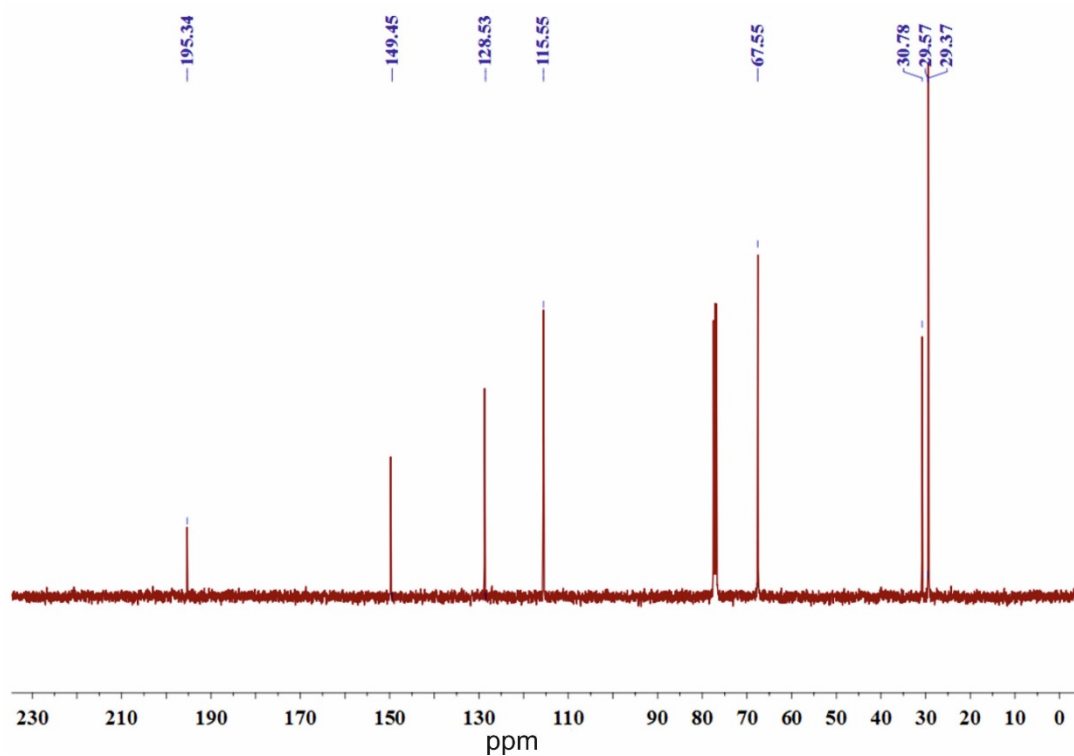

**Figure S4.**  $^{13}\text{C}$  NMR spectrum of 4,8,14,18,23,26,28,31,32,35 – deca-[2-mercaptoethoxy]-pillar[5]arene (3).  $\text{CDCl}_3$ , 298 K, 400 MHz.

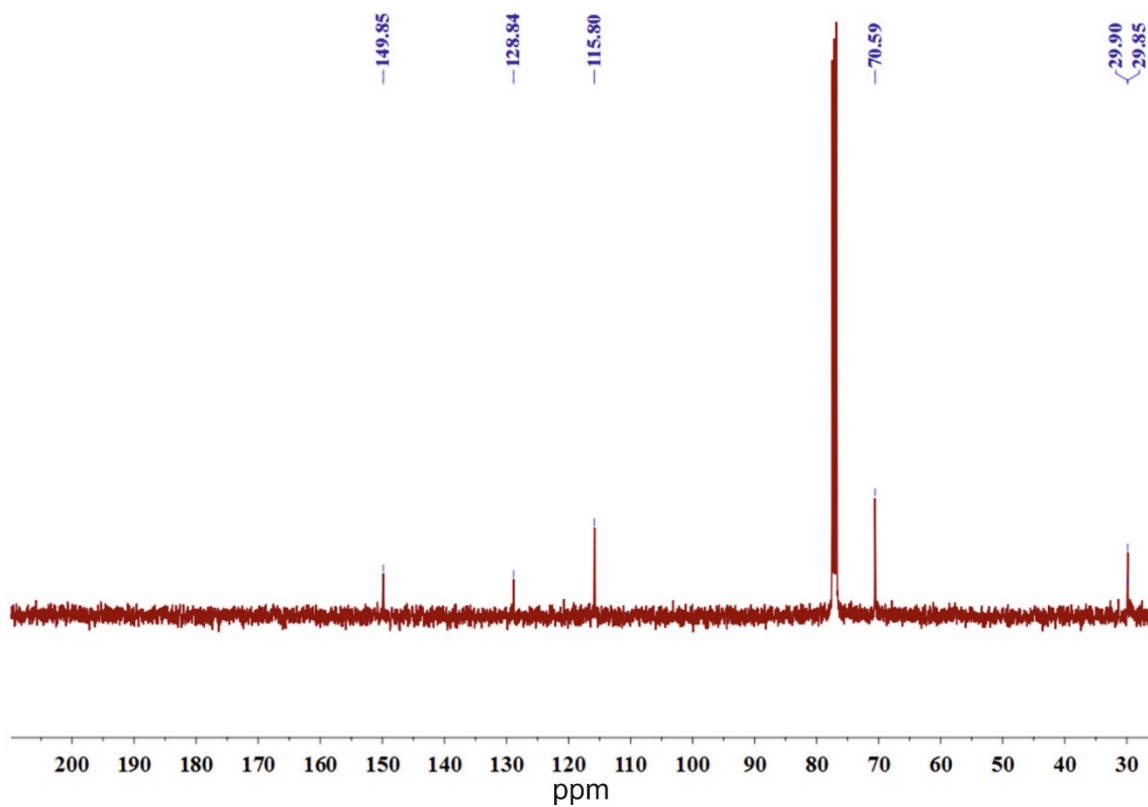



**Figure S5.** Mass spectrum (MALDI-TOF, 4-nitroaniline matrix) of 4,8,14,18,23,26,28,31,32,35 – deca-[acylthioethoxy]-pillar[5]arene (**2**).

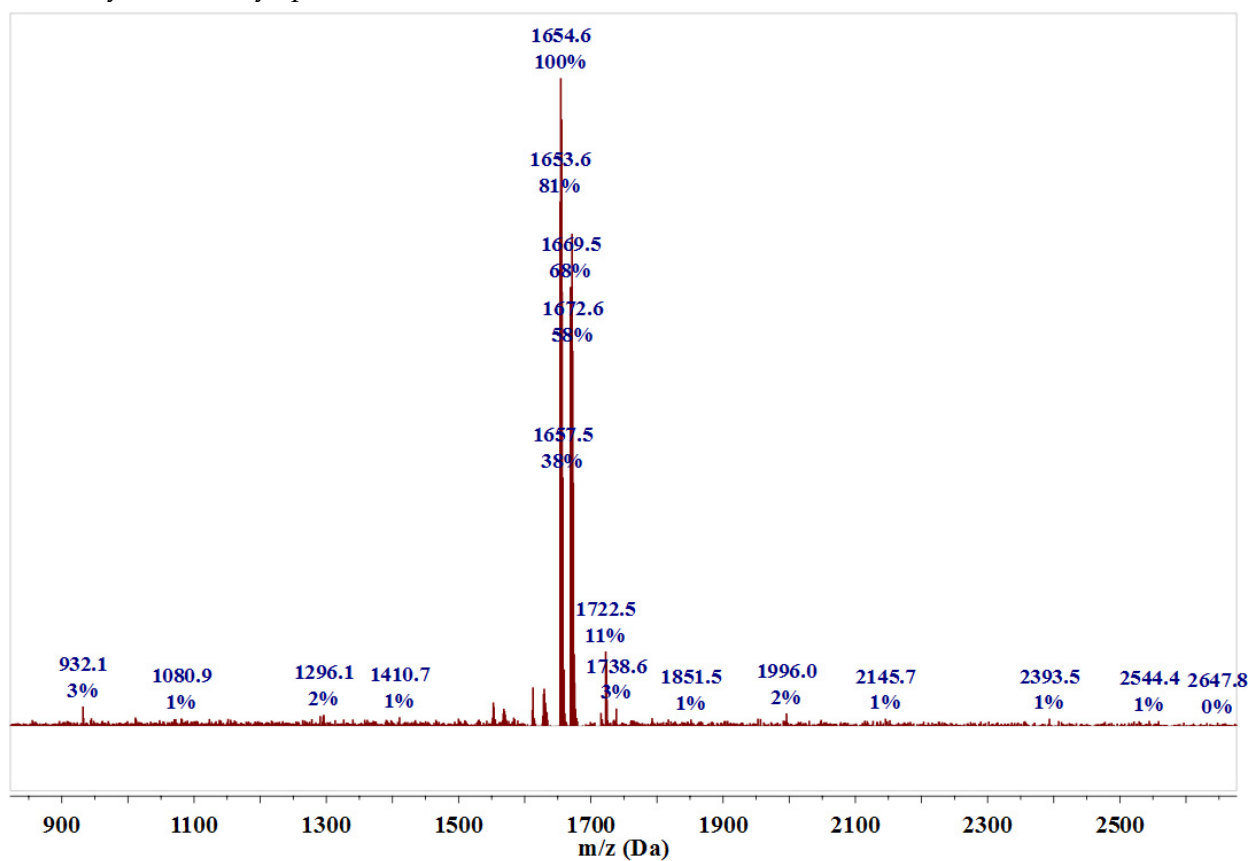

**Figure S6.** Mass spectrum (MALDI-TOF, 4-nitroaniline matrix) of 4,8,14,18,23,26,28,31,32,35 – deca-[2-mercaptoethoxy]-pillar[5]arene (**3**)

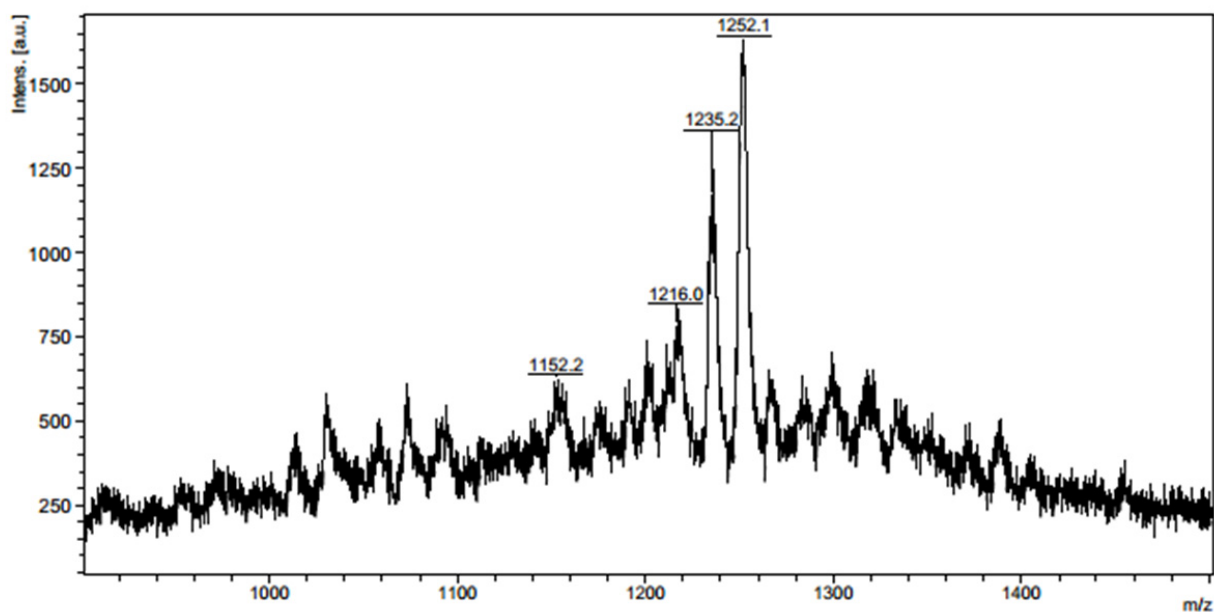

**Figure S7.** Mass spectrum (MALDI-TOF, 4-nitroaniline matrix) of tetrablock co-monomer, based on 4,8,14,18,23,26,28,31,32,35-deca-[2-mercaptoethoxy]-pillar[5]arene (**3**) and trimethylolpropane tris(3-mercaptopropionate), (**3/3S**).

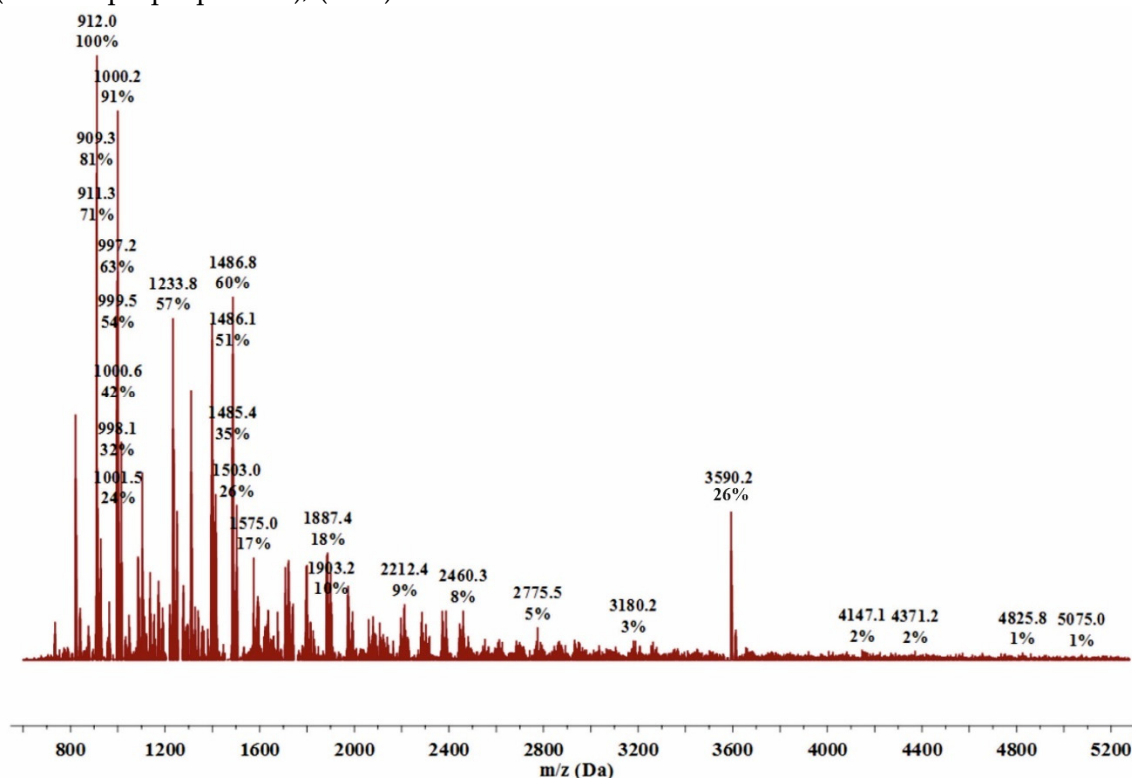

**Figure S8.** Mass spectrum (MALDI-TOF, 4-nitroaniline matrix) of tetrablock co-monomer, based on 4,8,14,18,23,26,28,31,32,35-deca-[2-mercaptoethoxy]-pillar[5]arene (**3**) and trimethylolpropane tris(3-mercaptopropionate), (**3/4S**).

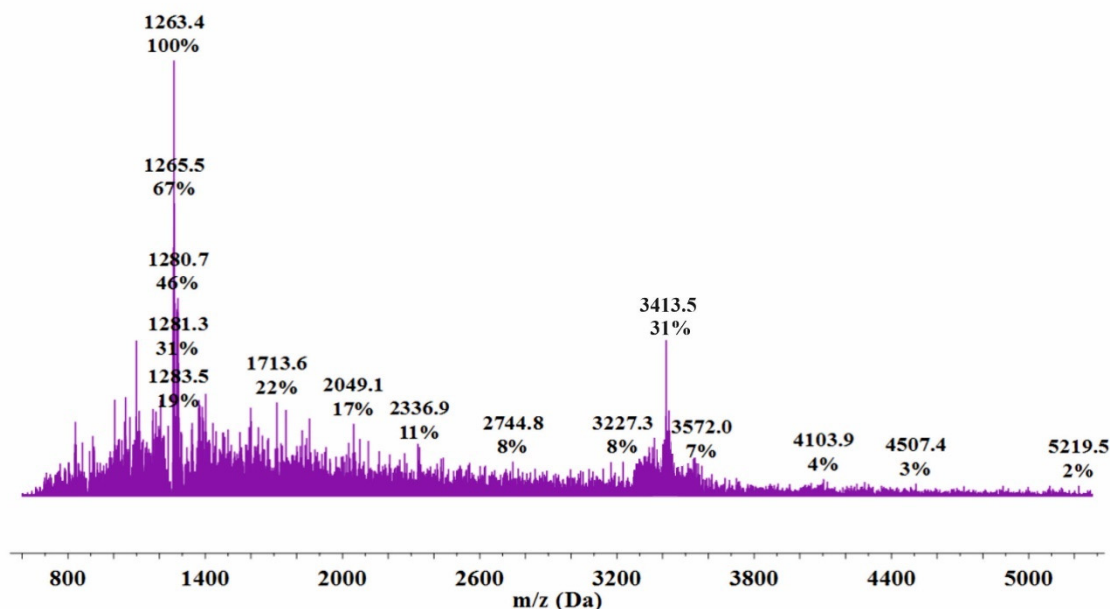

**Figure S9.** IR spectrum of 4,8,14,18,23,26,28,31,32,35 – deca-[acylthioethoxy]-pillar[5]arene (**2**).

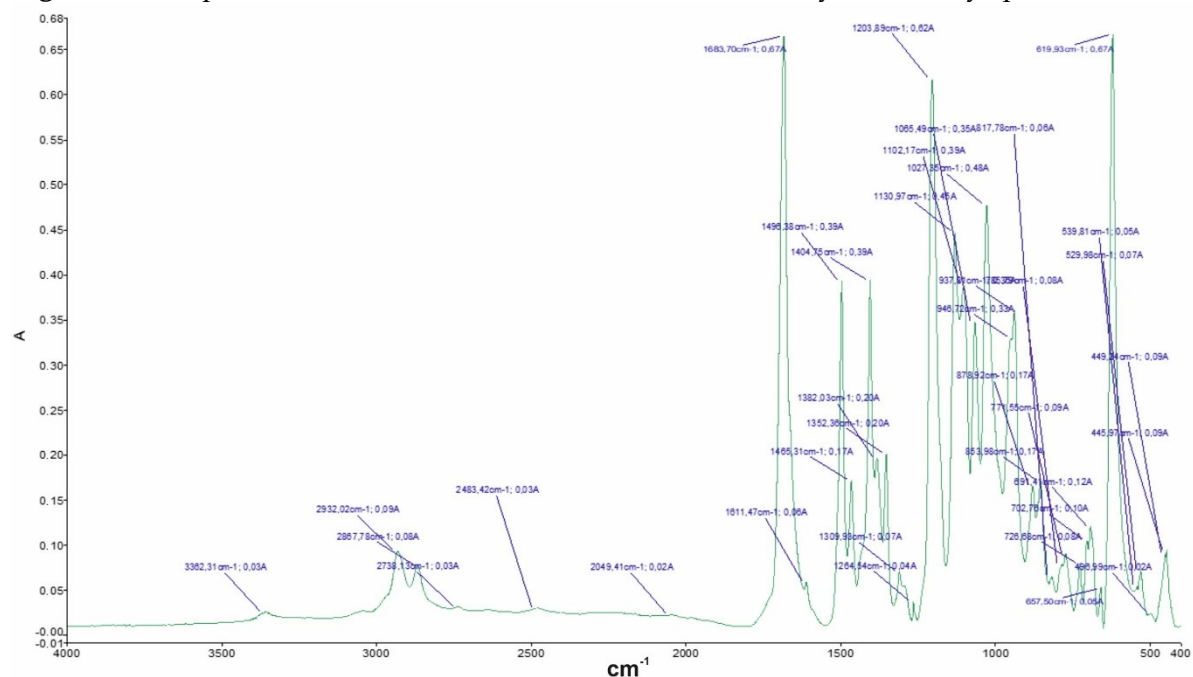

**Figure S10.** IR spectrum of 4,8,14,18,23,26,28,31,32,35 – deca-[2-mercaptoethoxy]-pillar[5]arene (**3**).

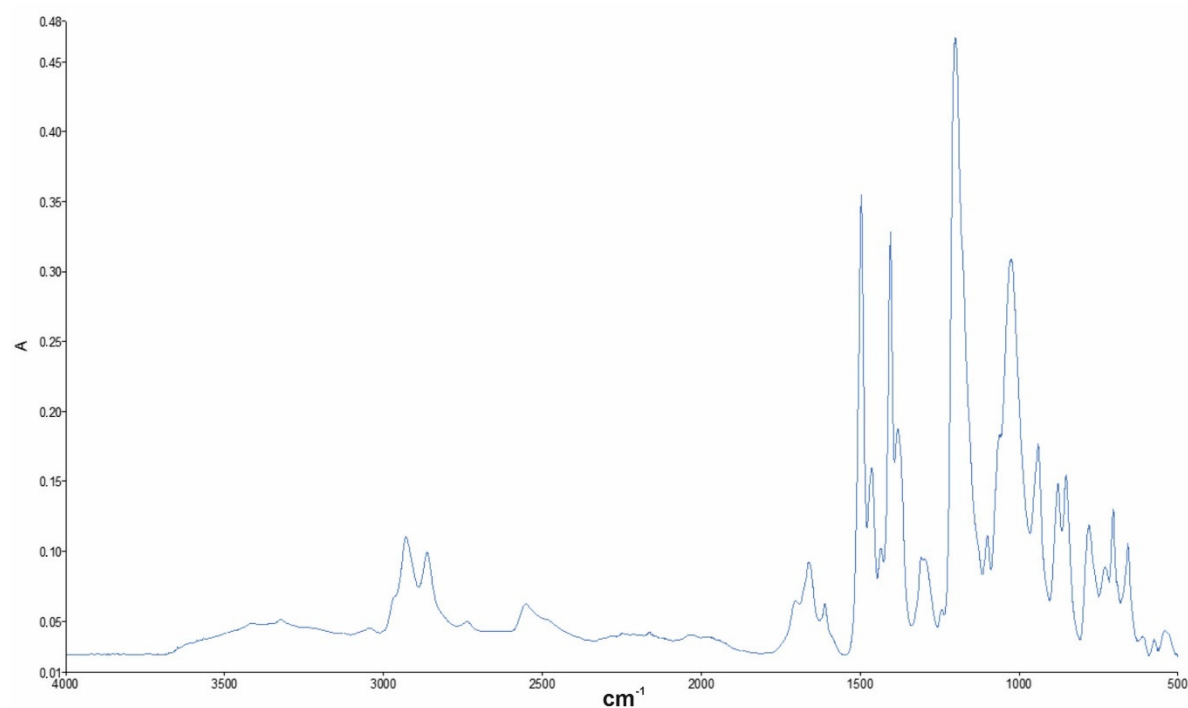

**Figure S11.** IR spectrum of 4,8,14,18,23,26,28,31,32,35-deca-[2-mercaptoethoxy]-pillar[5]arene (**3**)-based supramolecular polymer (**3**)<sub>n</sub>.

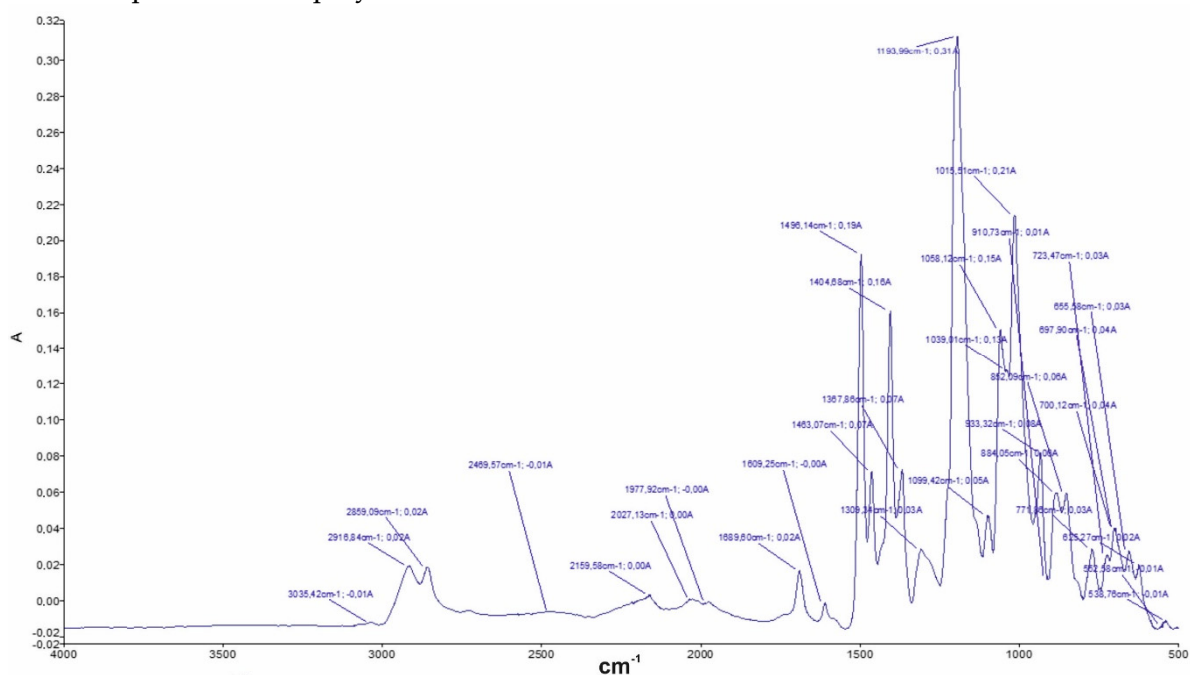

**Figure S12.** IR spectrum of tetrablock co-monomer, based on 4,8,14,18,23,26,28,31,32,35-deca-[2-mercaptoethoxy]-pillar[5]arene (**3**) and trimethylolpropane tris(3-mercaptopropionate), (**3**)<sub>3</sub>S

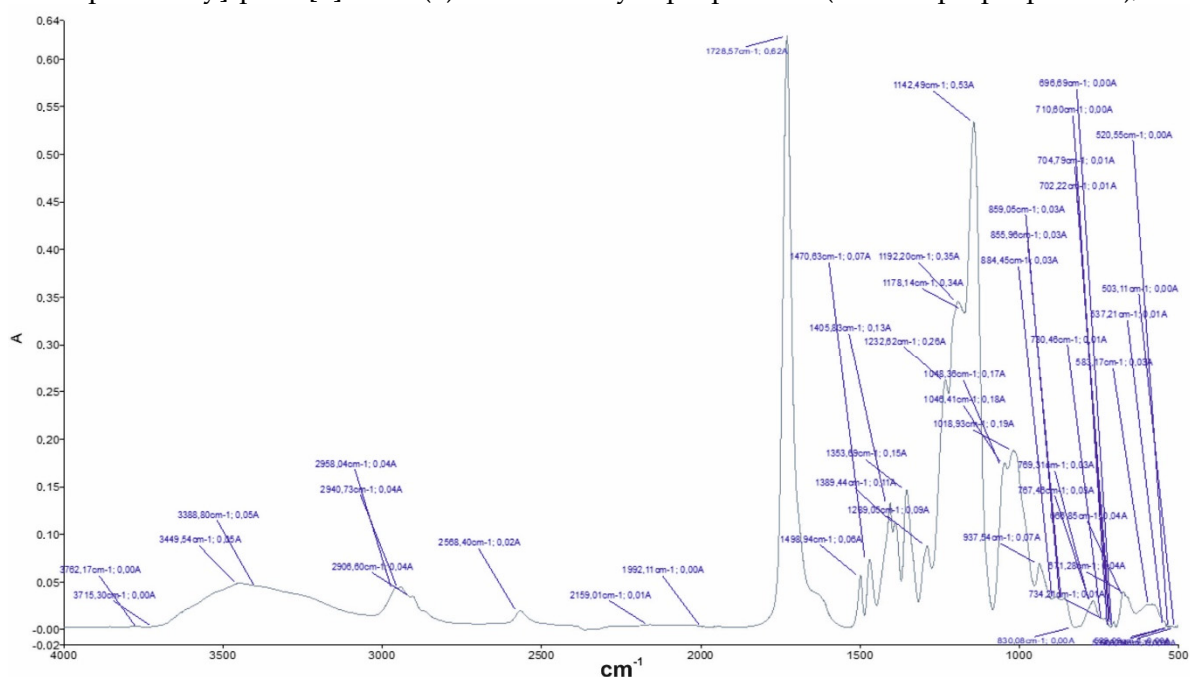

**Figure S13.** IR spectrum of tetrablock co-monomer, based on 4,8,14,18,23,26,28,31,32,35-deca-[2-mercaptoethoxy]-pillar[5]arene (**3**) and trimethylolpropane tris(3-mercaptopropionate), (**3/4S**).

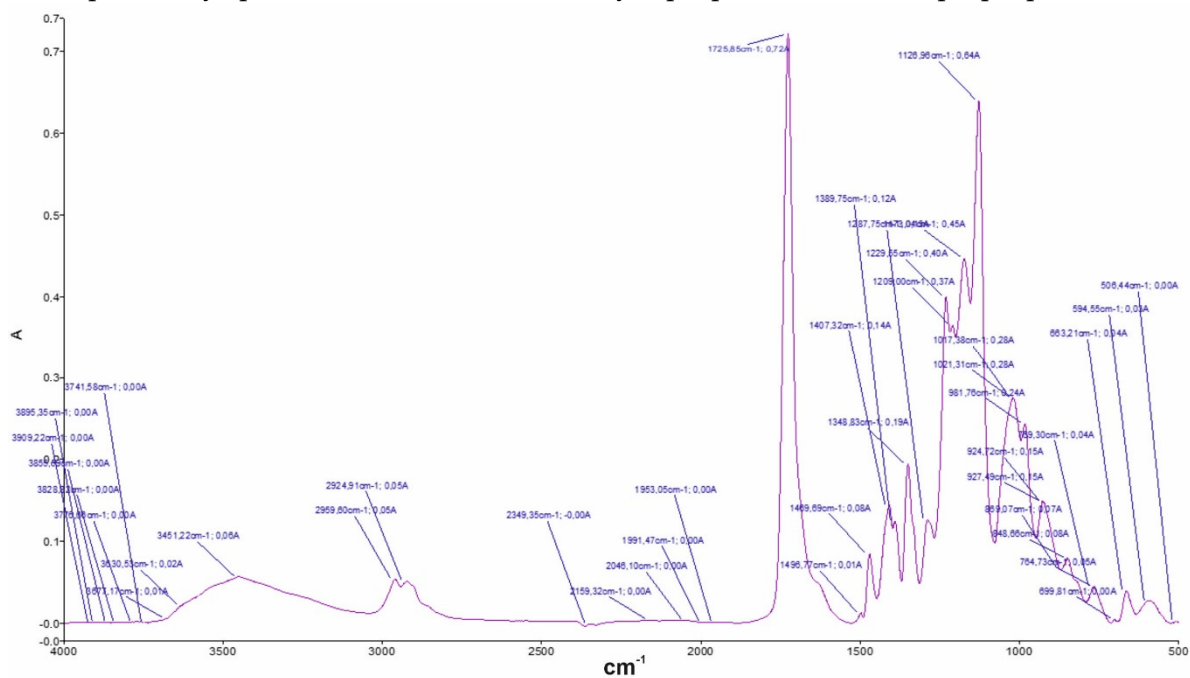

### 3. NMR study

**Figure S14.** (a) The 2D  $^1\text{H}$ - $^1\text{H}$  NOESY NMR spectrum of the **3** / moxi complex (2:1,  $5 \times 10^{-3}$  M) in  $\text{CHCl}_3/\text{CD}_3\text{OD} = 100:1$  at  $25^\circ\text{C}$ ; (b) 2D DOSY NMR **3** / moxi complex in  $\text{CHCl}_3/\text{CD}_3\text{OD} = 100:1$  at  $25^\circ\text{C}$  (400 MHz, 298K).

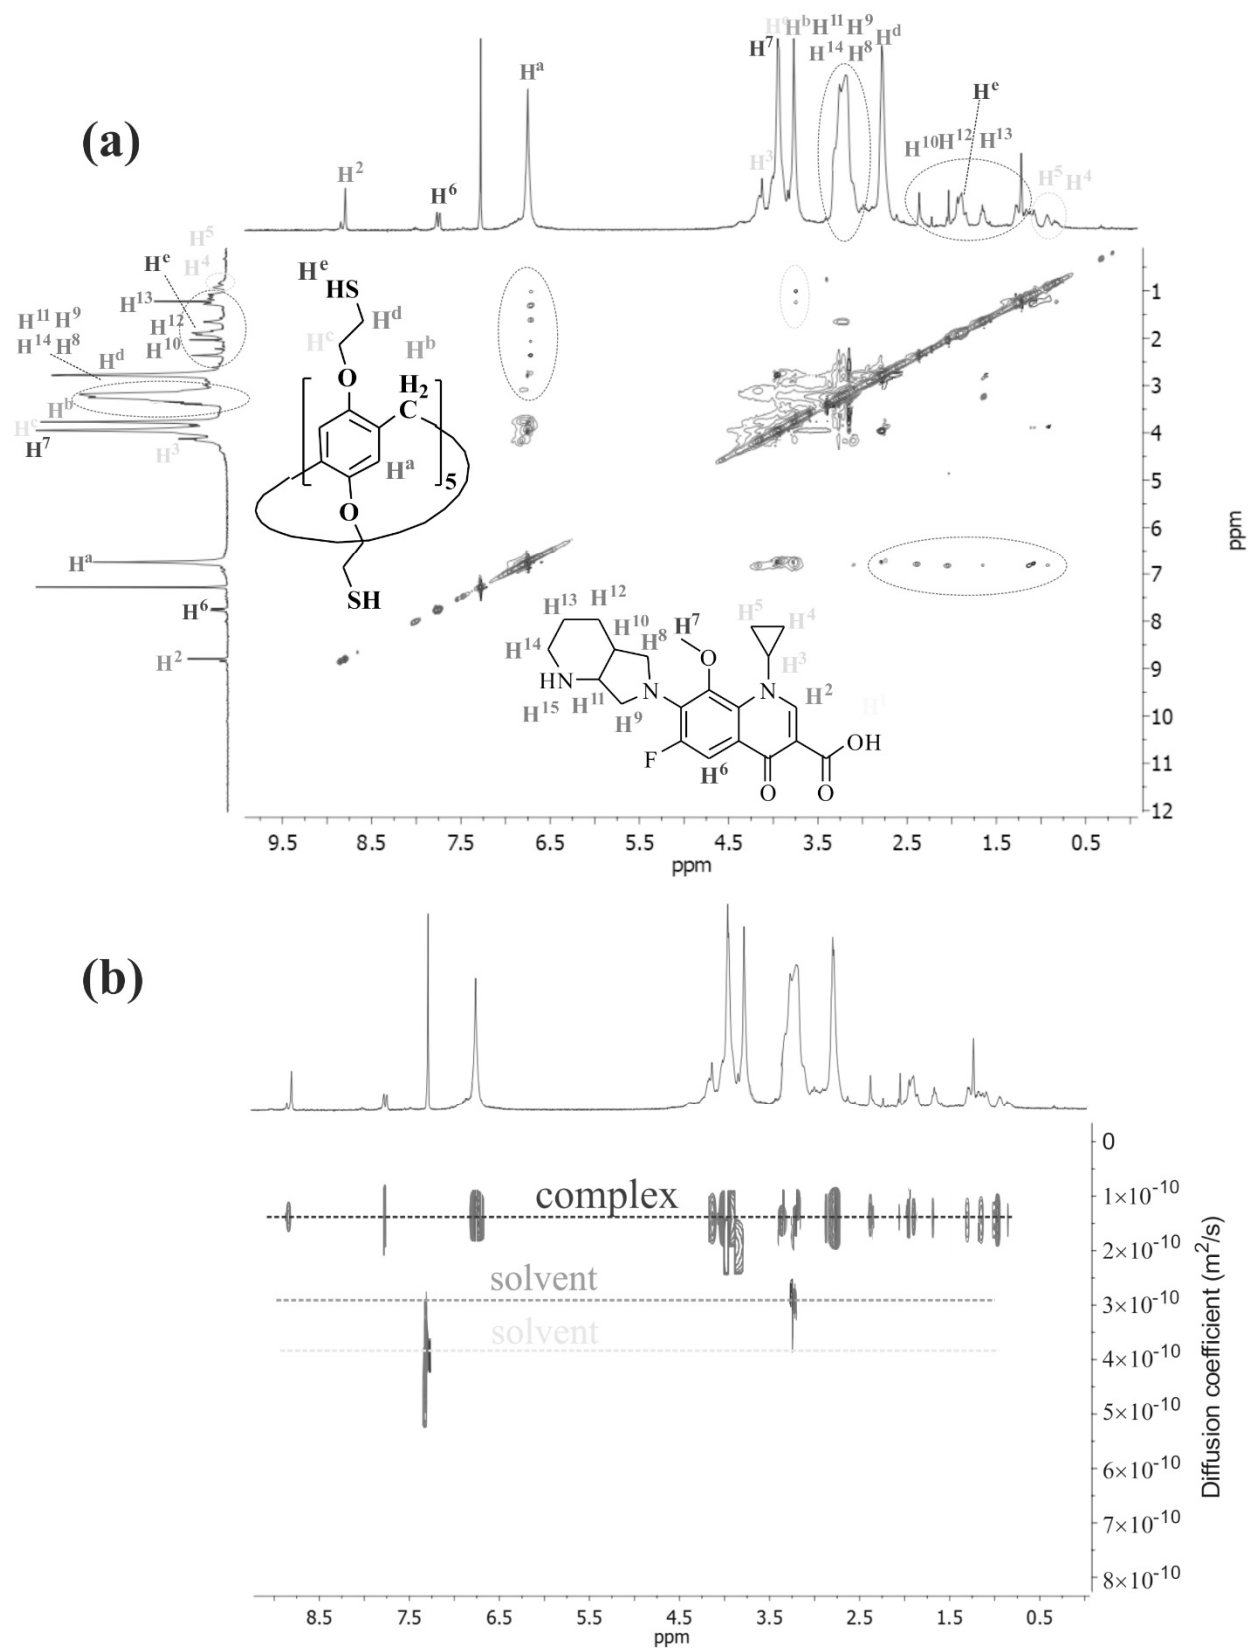

#### 4. Dynamic light scattering

**Figure S15.** Size distribution of the particles by intensity for **3** ( $1 \times 10^{-4}$  M) in solvent system THF: CH<sub>3</sub>OH 100:1 ( $d=845 \pm 303$  nm, PDI=  $0.42 \pm 0.06$ )

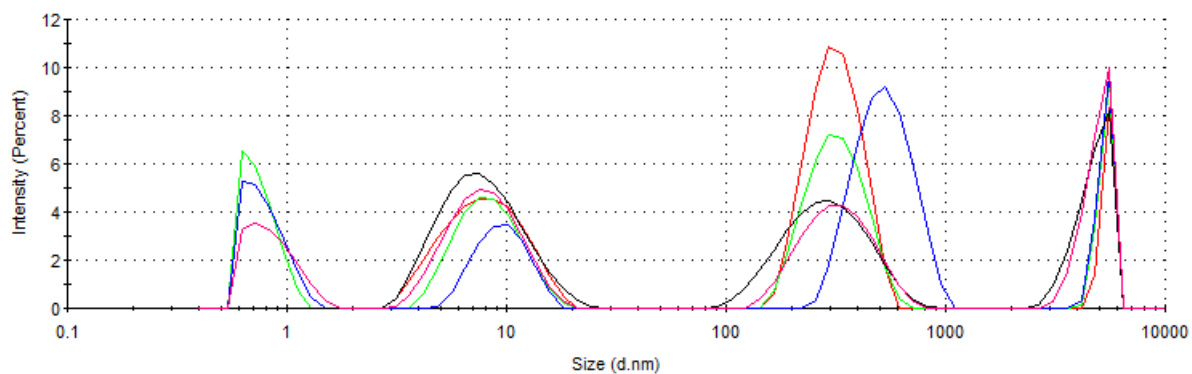

**Figure S16.** Size distribution of the particles by intensity for **3/3S** ( $1 \times 10^{-5}$  M) in solvent system THF: CH<sub>3</sub>OH 100:1 ( $d=782 \pm 254$  nm, PDI=  $0.650 \pm 0.174$ )

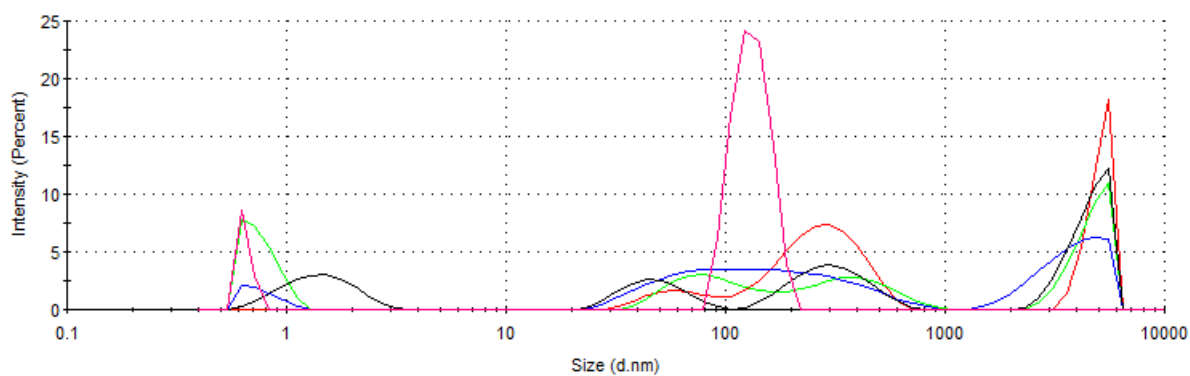

**Figure S17.** Size distribution of the particles by intensity for **3/4S** ( $1 \times 10^{-5}$  M) in solvent system THF: CH<sub>3</sub>OH 100:1 ( $d=640 \pm 193$  nm, PDI=  $0.35 \pm 0.02$ )

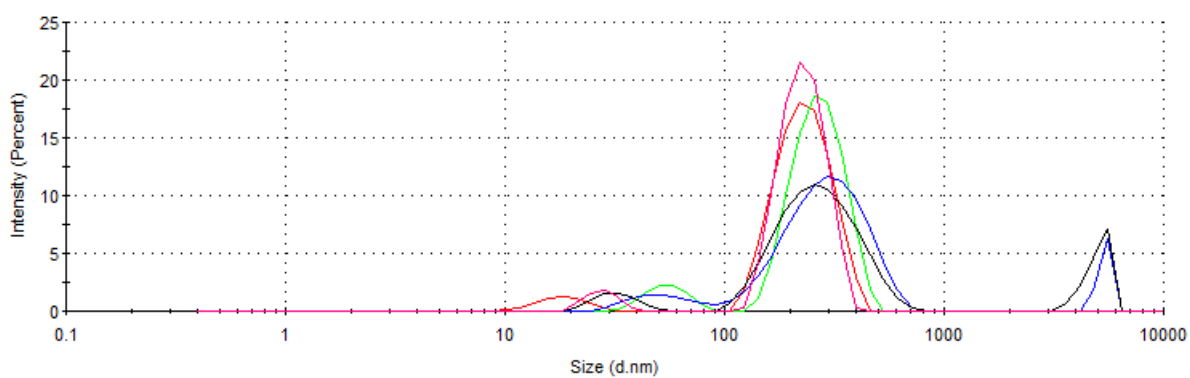

**Figure S18.** Size distribution of the particles by intensity for **moxi** ( $1 \times 10^{-4}$  M) in solvent system THF: CH<sub>3</sub>OH 100:1 ( $d = 1269 \pm 479$  nm, PDI =  $0.50 \pm 0.14$ )

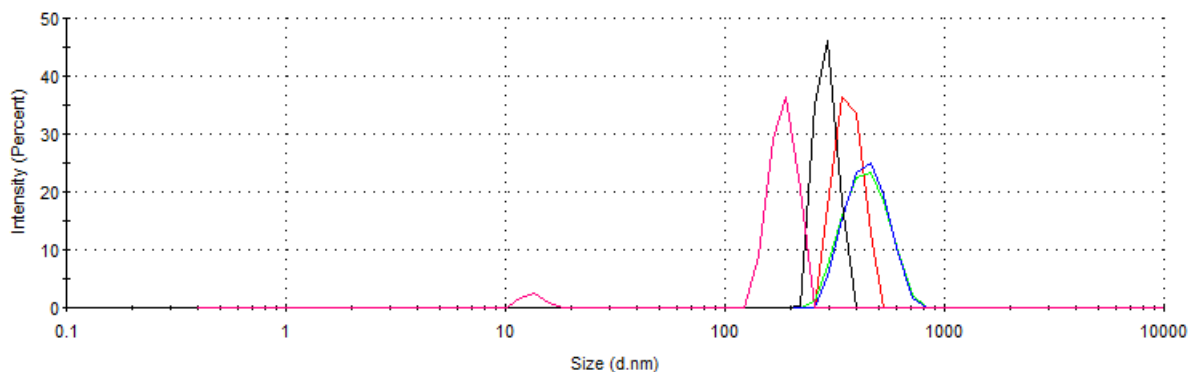

**Figure S19.** Size distribution of the particles by intensity for **BCI** ( $1 \times 10^{-4}$  M) in solvent system THF: CH<sub>3</sub>OH 100:1 ( $d = 209 \pm 21$  nm, PDI =  $0.24 \pm 0.06$ )

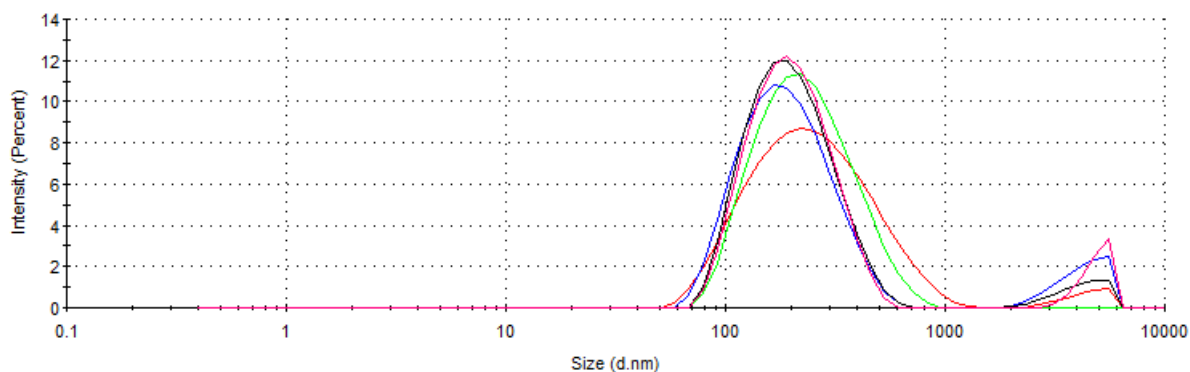

**Figure S20.** Size distribution of the particles by intensity for **3/3S** ( $1 \times 10^{-5}$  M) + **moxi** ( $1 \times 10^{-4}$  M) in solvent system THF: CH<sub>3</sub>OH 100:1 ( $d = 617 \pm 203$  nm, PDI =  $0.34 \pm 0.05$ )

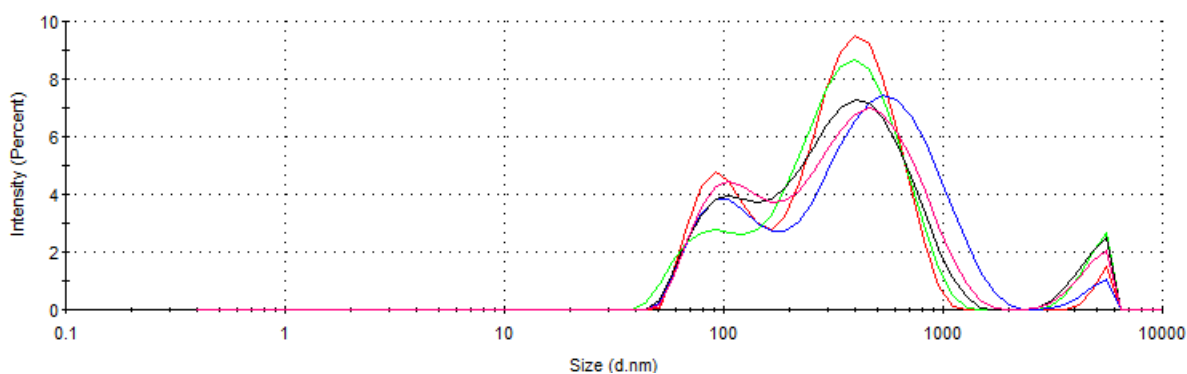

**Figure S21.** Size distribution of the particles by intensity for **3/4S** ( $1 \times 10^{-5}$  M) + **moxi** ( $1 \times 10^{-4}$  M) in solvent system THF: CH<sub>3</sub>OH 100:1 ( $d = 462 \pm 13$  nm, PDI =  $0.28 \pm 0.04$ )



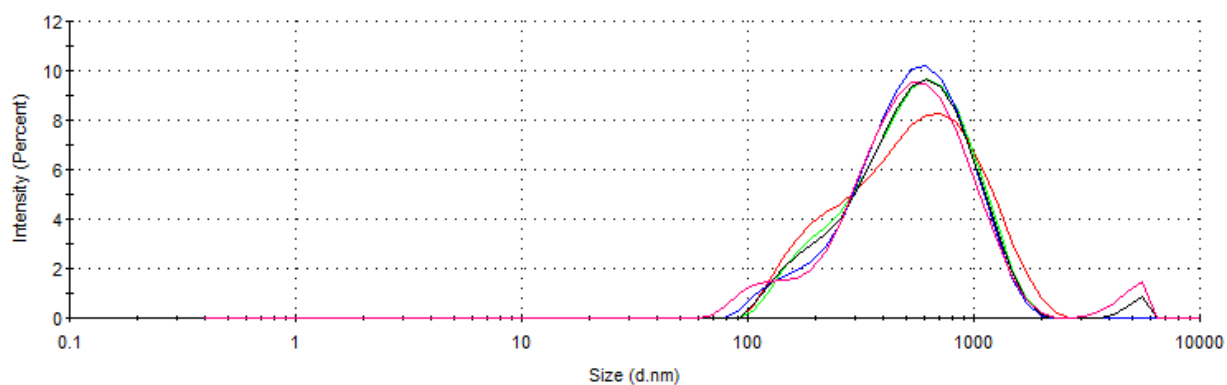

**Figure S22.** Size distribution of the particles by intensity for **(4S)n** ( $1 \times 10^{-5} \text{M}$ ) + **moxi** ( $1 \times 10^{-4} \text{M}$ ) in solvent system THF: CH<sub>3</sub>OH 100:1 ( $d = 561 \pm 7 \text{ nm}$ ,  $\text{PDI} = 0.24 \pm 0.02$ )

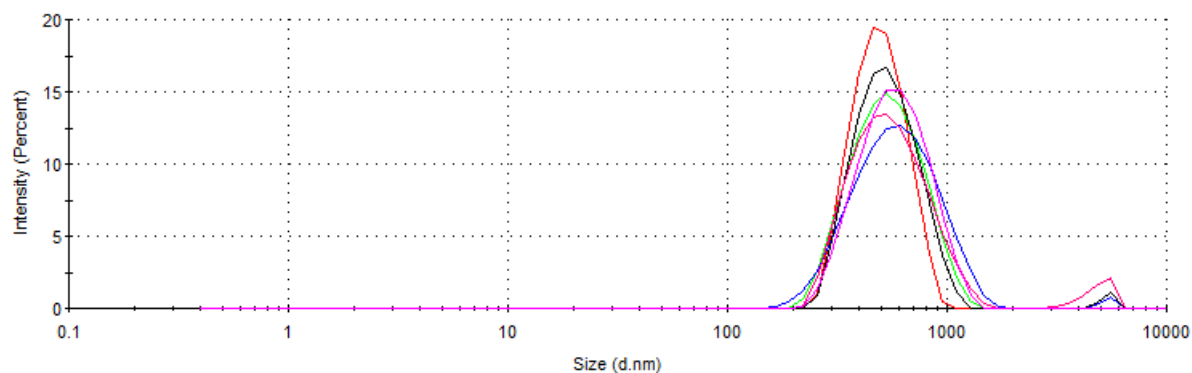

**Figure S23.** Size distribution of the particles by intensity for **3/3S** ( $1 \times 10^{-5} \text{M}$ ) + **BCl** ( $1 \times 10^{-4} \text{M}$ ) in solvent system THF: CH<sub>3</sub>OH 100:1 ( $d = 556 \pm 97 \text{ nm}$ ,  $\text{PDI} = 0.29 \pm 0.05$ )

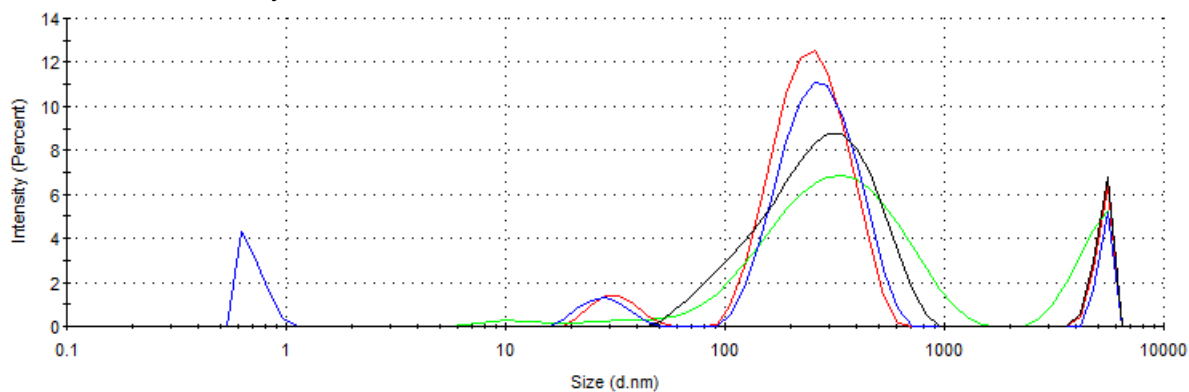

**Figure S24.** Size distribution of the particles by intensity for **3/4S** ( $1 \times 10^{-5} \text{M}$ ) + **BCl** ( $1 \times 10^{-4} \text{M}$ ) in solvent system THF: CH<sub>3</sub>OH 100:1 ( $d = 553 \pm 140 \text{ nm}$ ,  $\text{PDI} = 0.36 \pm 0.10$ )

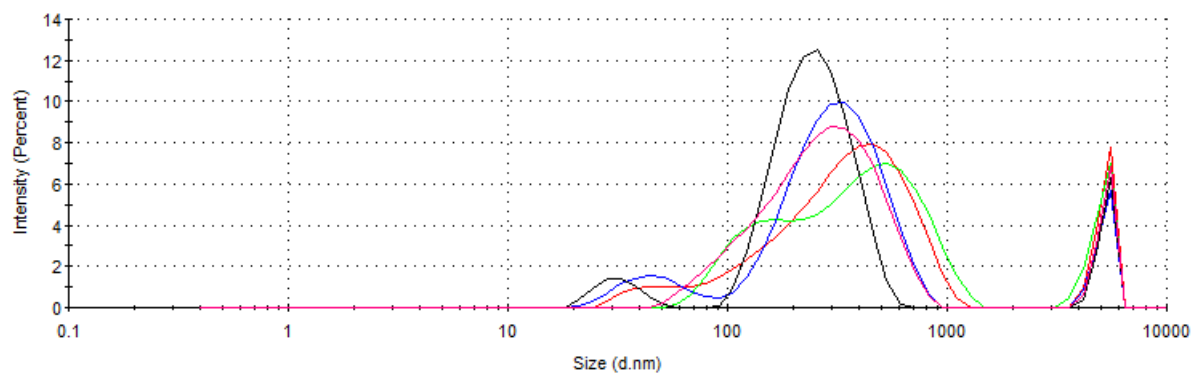

**Table S2. Aggregation of thiols, cross-linked polymers and model polymers**

| Sample                        | V <sub>H</sub> , mcl | C <sub>H</sub> , M | V <sub>G</sub> , mcl | C <sub>G</sub> , M | PDI                | Z <sub>average</sub> , nm |
|-------------------------------|----------------------|--------------------|----------------------|--------------------|--------------------|---------------------------|
| <b>3</b>                      | 150                  | 10 <sup>-3</sup>   | 0                    | 0                  | 0.670±0.117        | 743±214                   |
|                               | 150                  | 10 <sup>-4</sup>   | 0                    | 0                  | 0.591±0.148        | 874±352                   |
|                               | 150                  | 10 <sup>-5</sup>   | 0                    | 0                  | 0.425±0.059        | 845±303                   |
| <b>3/4S</b>                   | 1500                 | 10 <sup>-3</sup>   | 0                    | 0                  | 0.435±0.091        | 375±35                    |
|                               | 150                  | 10 <sup>-3</sup>   | 0                    | 0                  | 0.476±0.133        | 467±61                    |
|                               | 150                  | 10 <sup>-4</sup>   | 0                    | 0                  | 0.375±0.065        | 674±167                   |
| <b>3/3S</b>                   | 1500                 | 10 <sup>-3</sup>   | 0                    | 0                  | 0.606±0.218        | 1383±1259                 |
|                               | 150                  | 10 <sup>-3</sup>   | 0                    | 0                  | 0.678±0.115        | 1810±422                  |
|                               | 150                  | 10 <sup>-4</sup>   | 0                    | 0                  | 0.650±0.174        | 782±254                   |
| <b>(4S)<sub>n</sub></b>       | 1500                 | 10 <sup>-3</sup>   | 0                    | 0                  | 0.367±0.116        | 536±20                    |
|                               | 150                  | 10 <sup>-3</sup>   | 0                    | 0                  |                    |                           |
|                               | 150                  | 10 <sup>-4</sup>   | 0                    | 0                  |                    |                           |
|                               | 150                  | 10 <sup>-5</sup>   | 0                    | 0                  |                    |                           |
| <b>(3S)<sub>n</sub></b>       | 1500                 | 10 <sup>-3</sup>   | 0                    | 0                  | 0.422±0.055        | 1583±139                  |
|                               | 150                  | 10 <sup>-3</sup>   | 0                    | 0                  |                    |                           |
|                               | 150                  | 10 <sup>-4</sup>   | 0                    | 0                  |                    |                           |
|                               | 150                  | 10 <sup>-5</sup>   | 0                    | 0                  |                    |                           |
| <b>Moxi</b>                   | 0                    | 0                  | 15                   | 10 <sup>-2</sup>   | 0.589±0.190        | 1504±441                  |
|                               | 0                    | 0                  | 15                   | 10 <sup>-3</sup>   |                    |                           |
|                               | 0                    | 0                  | 15                   | 10 <sup>-4</sup>   |                    |                           |
| <b>BCI</b>                    | 0                    | 0                  | 15                   | 10 <sup>-2</sup>   | <b>0.236±0.058</b> | 209±21                    |
|                               | 0                    | 0                  | 15                   | 10 <sup>-3</sup>   |                    |                           |
|                               | 0                    | 0                  | 15                   | 10 <sup>-4</sup>   |                    |                           |
| <b>3/4S: Moxi</b>             | 150                  | 10 <sup>-4</sup>   | 15                   | 10 <sup>-2</sup>   | <b>0.295±0.035</b> | 373±17                    |
|                               | 150                  | 10 <sup>-5</sup>   | 15                   | 10 <sup>-3</sup>   | <b>0.276±0.040</b> | 446±13                    |
|                               | 150                  | 10 <sup>-4</sup>   | 15                   | 10 <sup>-4</sup>   | 0.374±0.078        | 600±284                   |
| <b>3/3S: Moxi</b>             | 150                  | 10 <sup>-4</sup>   | 15                   | 10 <sup>-2</sup>   | 0.410±0.154        | 860±426                   |
|                               | 150                  | 10 <sup>-5</sup>   | 15                   | 10 <sup>-3</sup>   | 0.337±0.048        | 617±203                   |
|                               | 150                  | 10 <sup>-4</sup>   | 15                   | 10 <sup>-4</sup>   | 0.447±0.156        | 525±120                   |
| <b>(4S)<sub>n</sub>: Moxi</b> | 150                  | 10 <sup>-4</sup>   | 15                   | 10 <sup>-2</sup>   | <b>0.235±0.025</b> | 561±7                     |
|                               | 150                  | 10 <sup>-5</sup>   | 15                   | 10 <sup>-3</sup>   |                    |                           |
|                               | 150                  | 10 <sup>-6</sup>   | 15                   | 10 <sup>-4</sup>   |                    |                           |
| <b>(3S)<sub>n</sub>: Moxi</b> | 150                  | 10 <sup>-4</sup>   | 15                   | 10 <sup>-2</sup>   | 0.618±0.296        | 1786±114                  |
|                               | 150                  | 10 <sup>-5</sup>   | 15                   | 10 <sup>-3</sup>   |                    |                           |
|                               | 150                  | 10 <sup>-6</sup>   | 15                   | 10 <sup>-4</sup>   |                    |                           |
| <b>3/4S: BCI</b>              | 150                  | 10 <sup>-4</sup>   | 15                   | 10 <sup>-2</sup>   | 0.383±0.103        | 554±128                   |
|                               | 150                  | 10 <sup>-5</sup>   | 15                   | 10 <sup>-3</sup>   |                    |                           |
|                               | 150                  | 10 <sup>-6</sup>   | 15                   | 10 <sup>-4</sup>   |                    |                           |
| <b>3/3S: BCI</b>              | 150                  | 10 <sup>-4</sup>   | 15                   | 10 <sup>-2</sup>   | <b>0.294±0.050</b> | 556±97                    |
|                               | 150                  | 10 <sup>-5</sup>   | 15                   | 10 <sup>-3</sup>   |                    |                           |
|                               | 150                  | 10 <sup>-6</sup>   | 15                   | 10 <sup>-4</sup>   |                    |                           |
| <b>(4S)<sub>n</sub>: BCI</b>  | 150                  | 10 <sup>-4</sup>   | 15                   | 10 <sup>-2</sup>   | <b>0.269±0.031</b> | 533±130                   |

|                         |     |           |    |           |             |          |
|-------------------------|-----|-----------|----|-----------|-------------|----------|
|                         | 150 | $10^{-5}$ | 15 | $10^{-3}$ |             |          |
|                         | 150 | $10^{-6}$ | 15 | $10^{-4}$ |             |          |
| (3S) <sub>n</sub> : BCI | 150 | $10^{-4}$ | 15 | $10^{-2}$ | 0.351±0.192 | 1898±202 |
|                         | 150 | $10^{-5}$ | 15 | $10^{-3}$ |             |          |
|                         | 150 | $10^{-6}$ | 15 | $10^{-4}$ |             |          |

## 5. UV-vis study

**Figure S25.** Absorption spectra of macrocycle **3** ( $1 \times 10^{-5}$  M) with a BCl solution ( $1 \times 10^{-4}$  M) in the solvent system THF: CH<sub>3</sub>OH = 100: 1

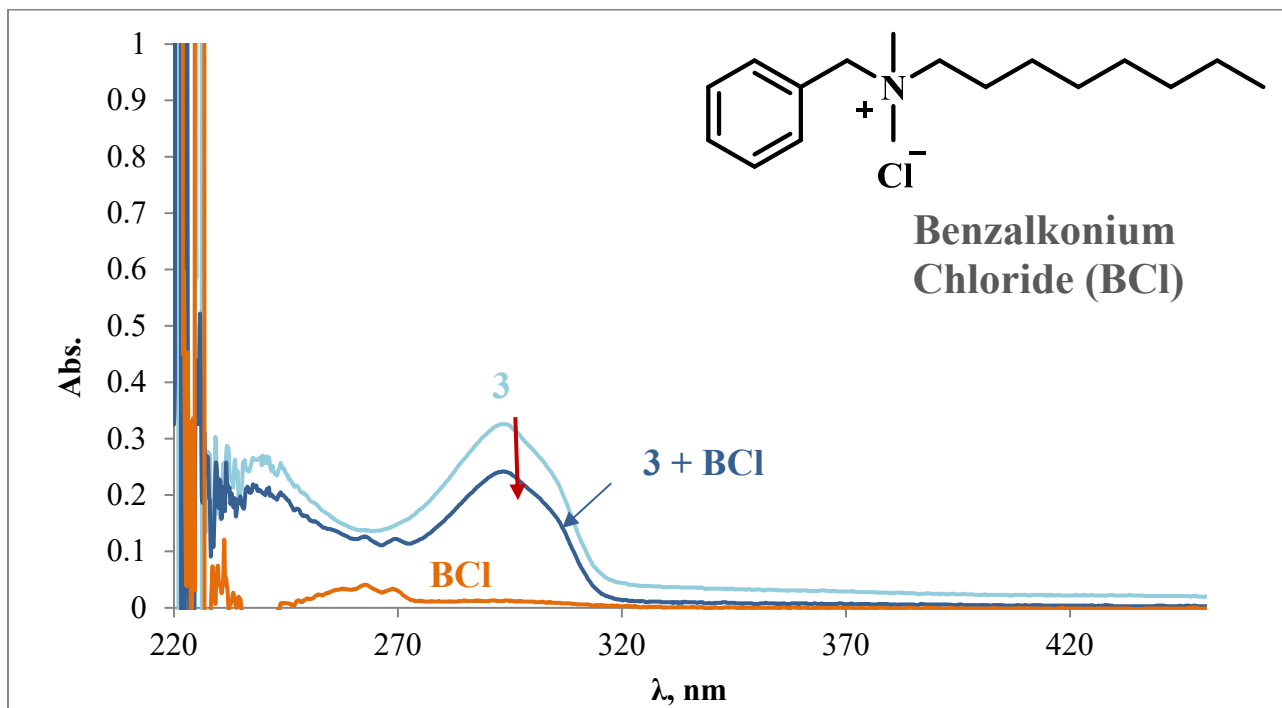

**Figure S26.** Absorption spectra of macrocycle **3** ( $1 \times 10^{-5}$  M) with a **moxi** solution ( $1 \times 10^{-4}$  M) in the solvent system THF: CH<sub>3</sub>OH = 100: 1

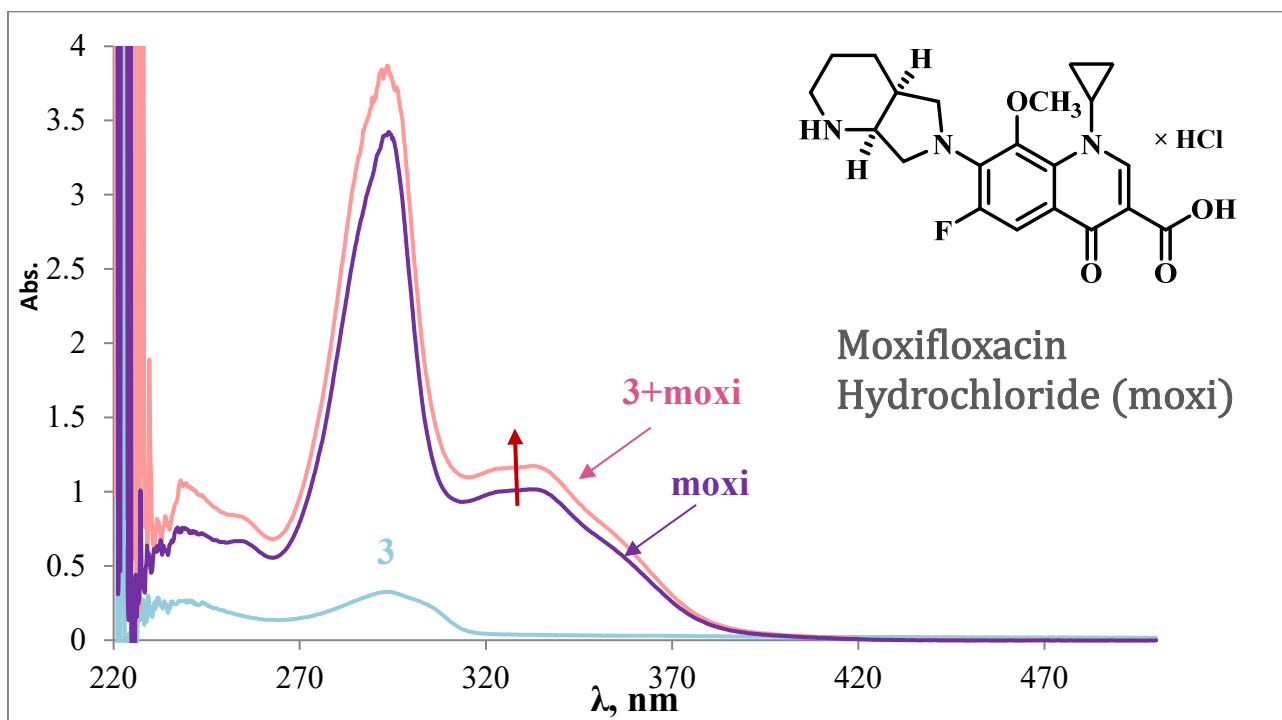

**Figure S27.** Titration curve for the system macrocycle **3** ( $0$ - $2.67 \times 10^{-5}$  M) / **moxi** ( $1 \times 10^{-5}$  M) in solvent system THF: CH<sub>3</sub>OH=100:1

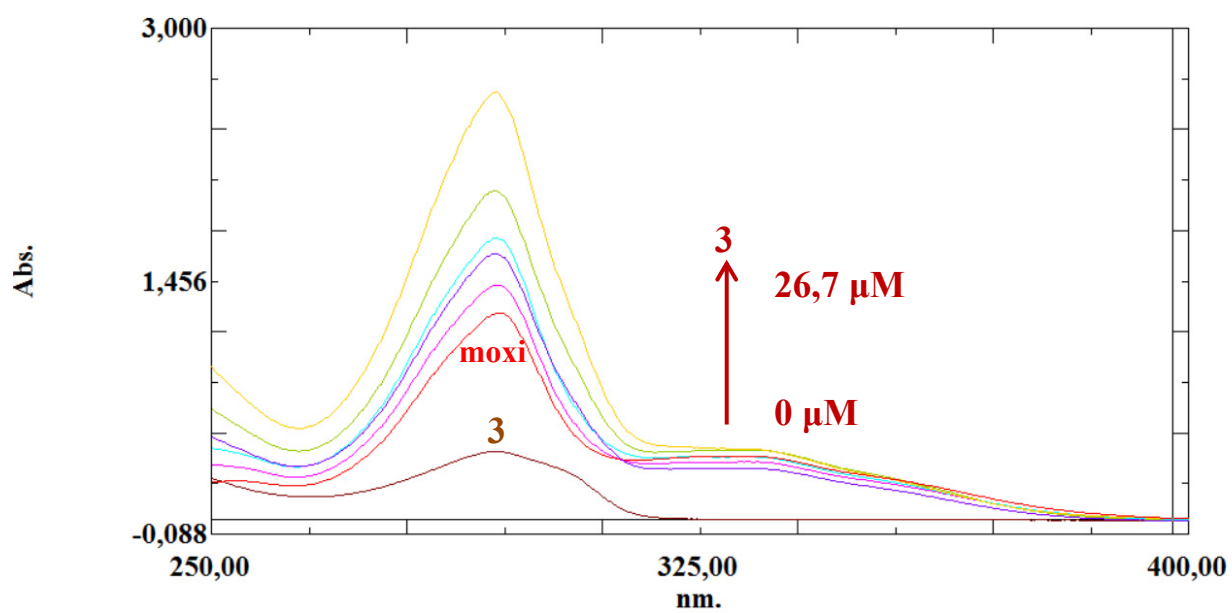

**Figure S28.** Bindfit (Fit data to 1:1, 1:2 and 2:1 Host-Guest equilibria) screenshots taken from the summary window of the website supramolecular.org. This screenshots shows the raw data for UV-vis titration of **3** with **moxi**, the data fitted to 1:1 binding model (a), 1:2 binding model (b) and 2:1 binding model (c).

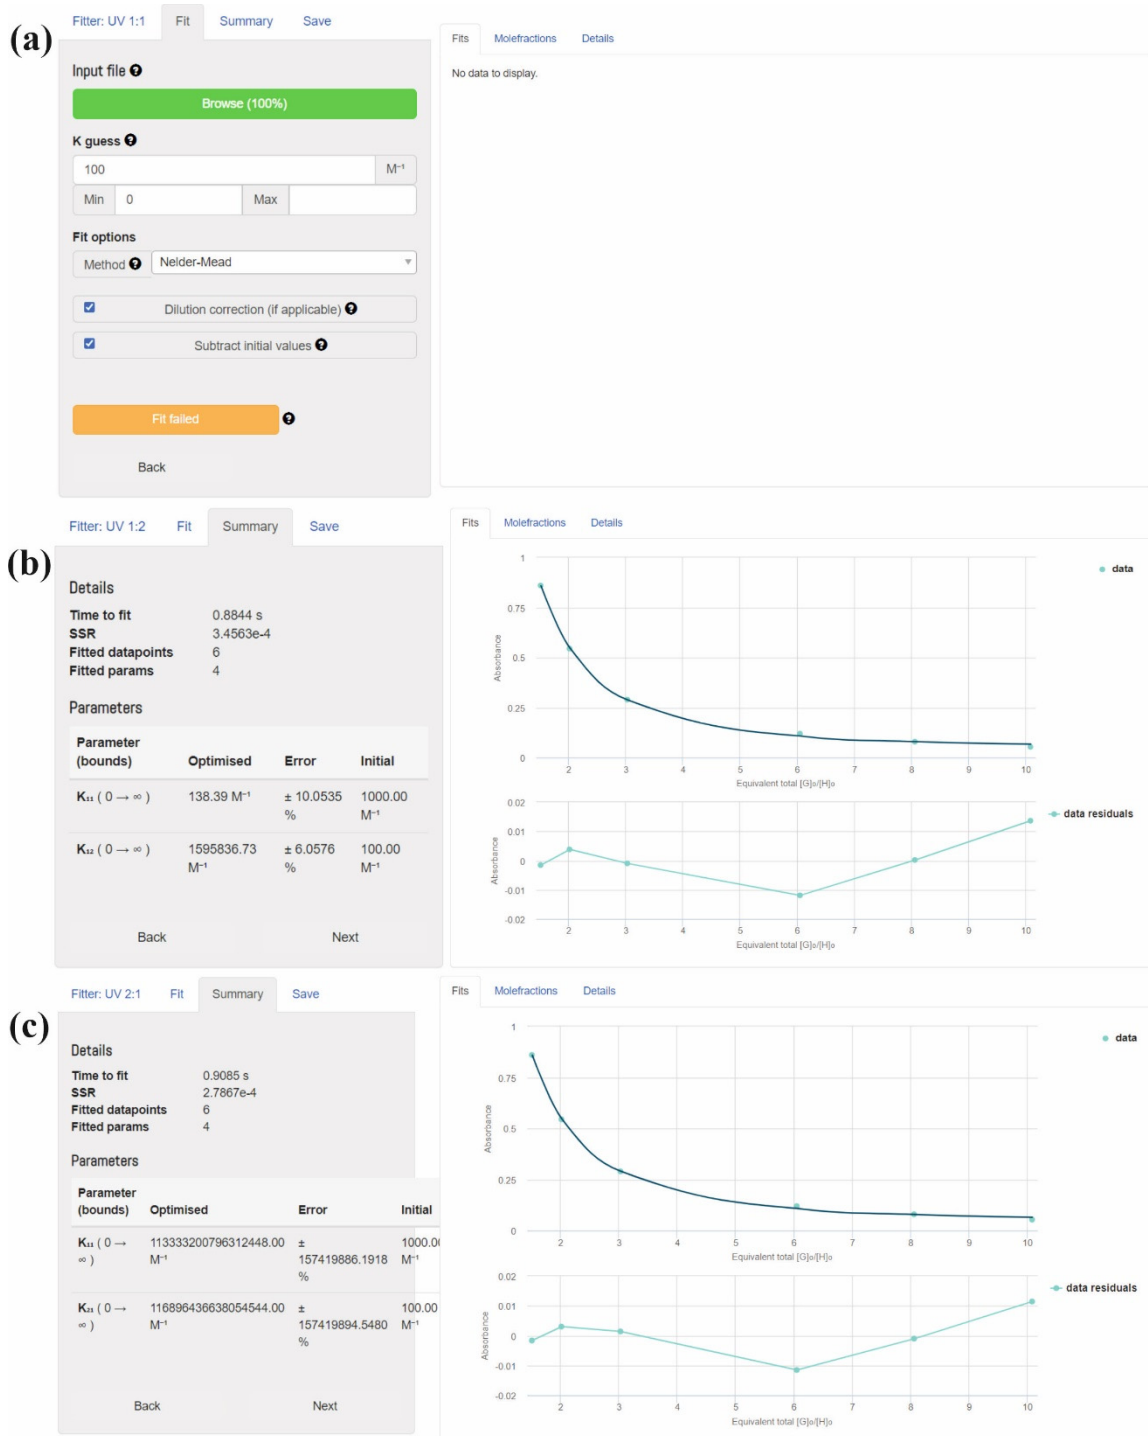

## 6. Chromatographic study of 3/3S, 3/4S, (3S)n, (4S)n.

Figure S29. GPC curves of products 3/3S (eluent-THF, calibrated by PS standards)

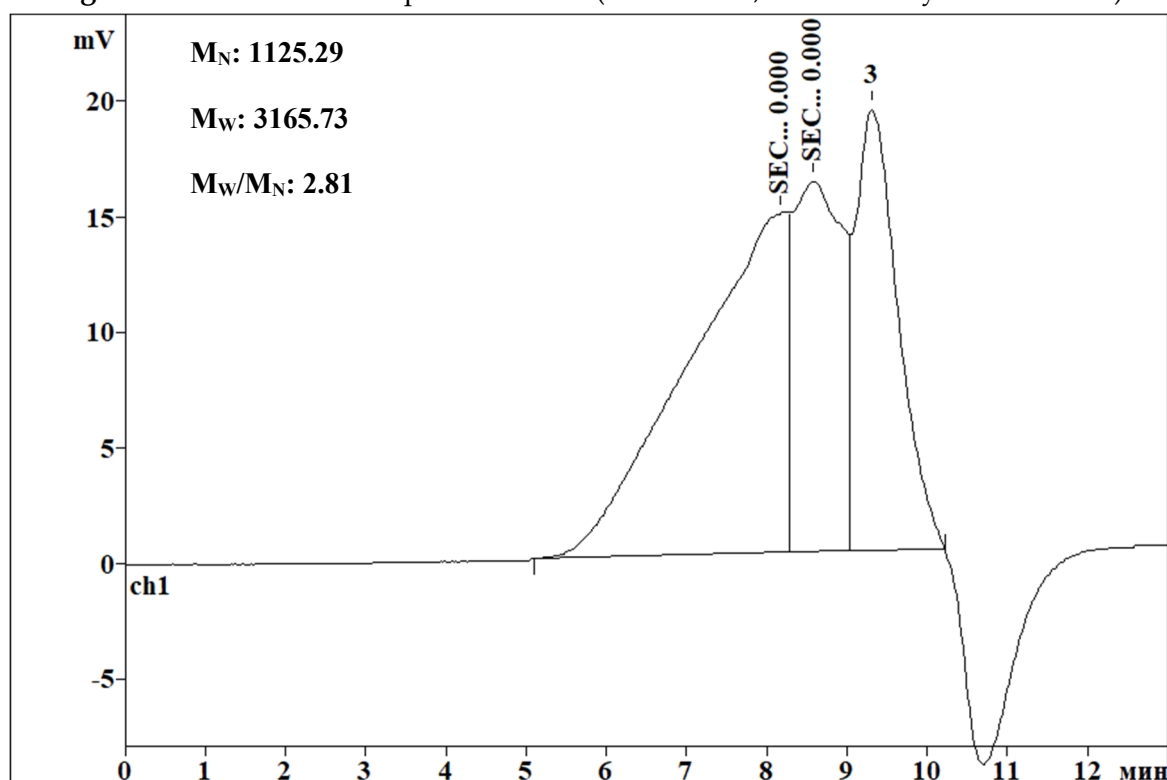

Figure S30. GPC curves of products 3/4S (eluent-THF, calibrated by PS standards)

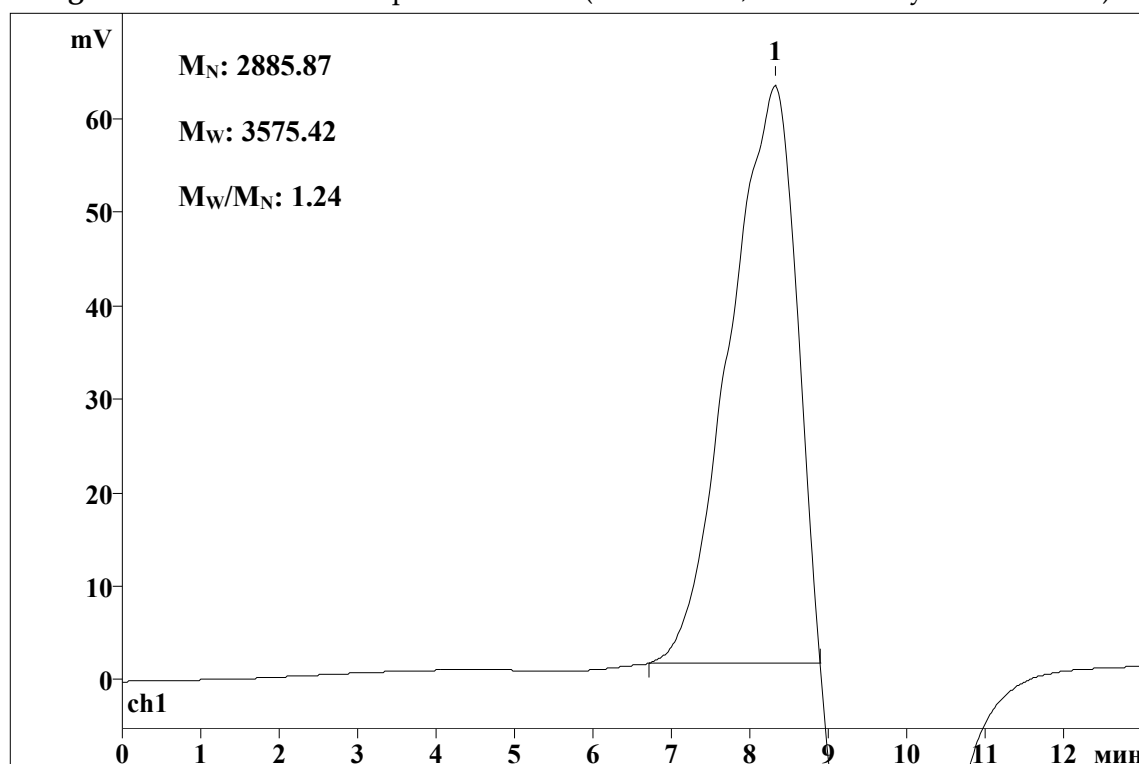

## 8. Thermal Gravimetric Analysis of 3, 3n, 3/3S, 3/4S

**Figure S31.** TGA (green) and differential scanning calorimetry (DSC) (blue) curves of **3**.

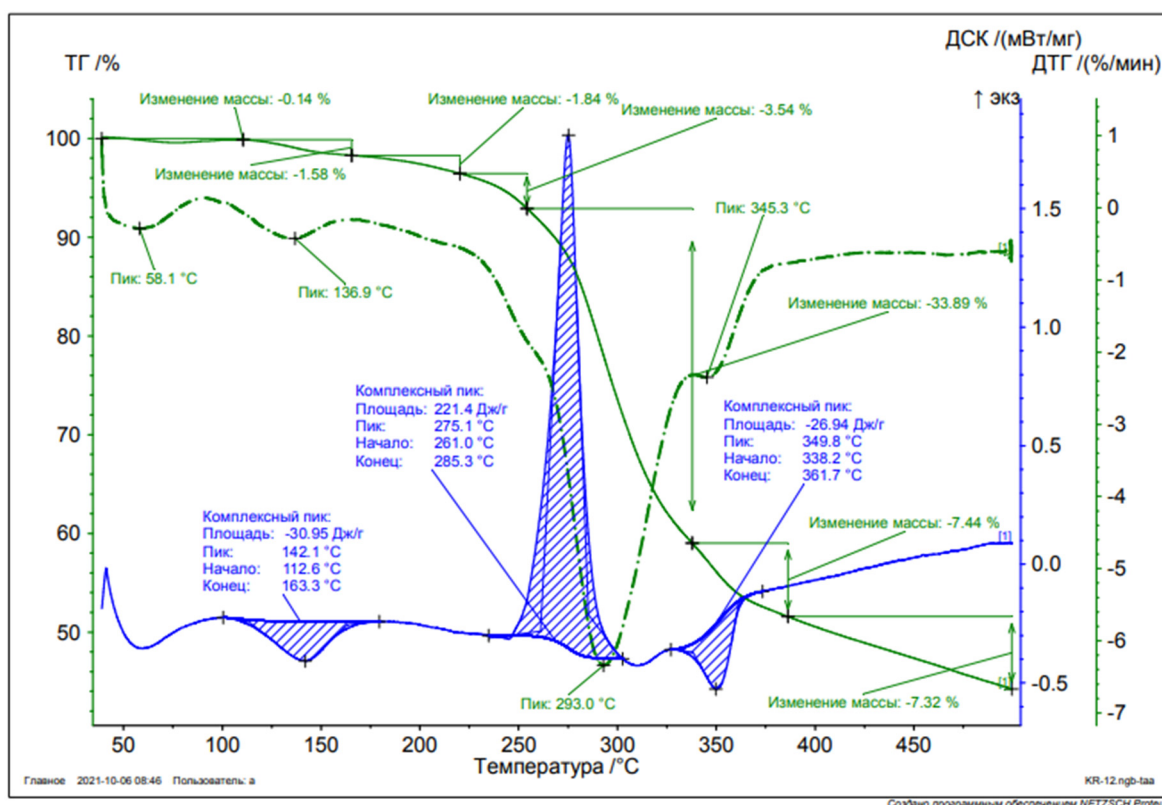

**Figure S32.** TGA (green) and differential scanning calorimetry (DSC) (blue) curves of **3n**.

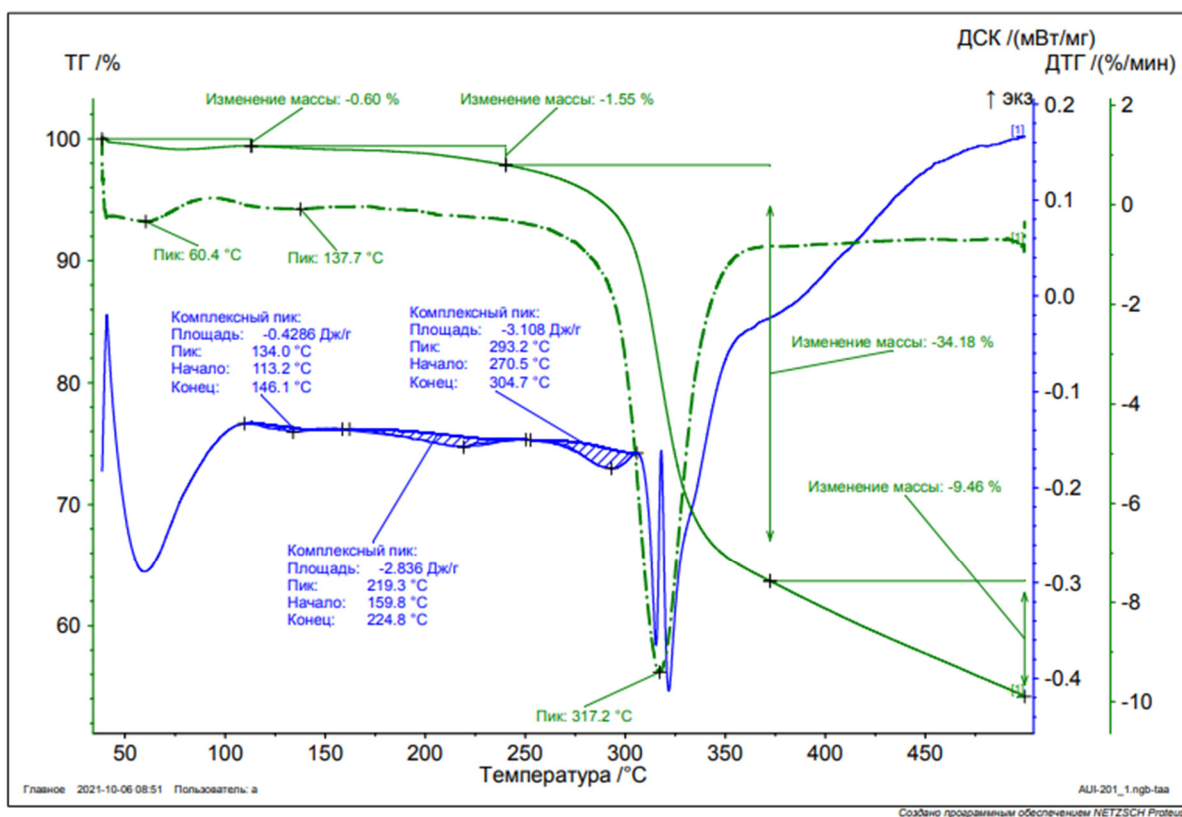



**Figure S33.** TGA (green) and differential scanning calorimetry (DSC) (blue) curves of 3/3Sn.

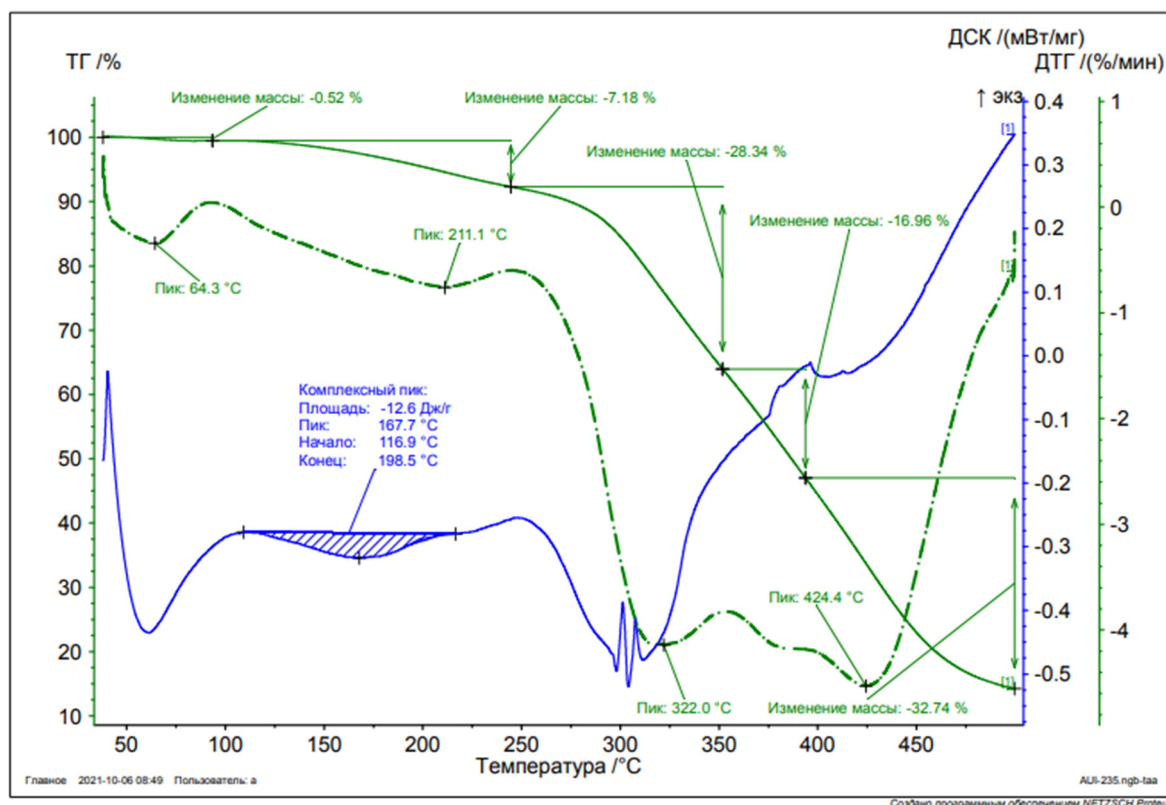

**Figure S34.** TGA (green) and differential scanning calorimetry (DSC) (blue) curves of 3/4Sn.

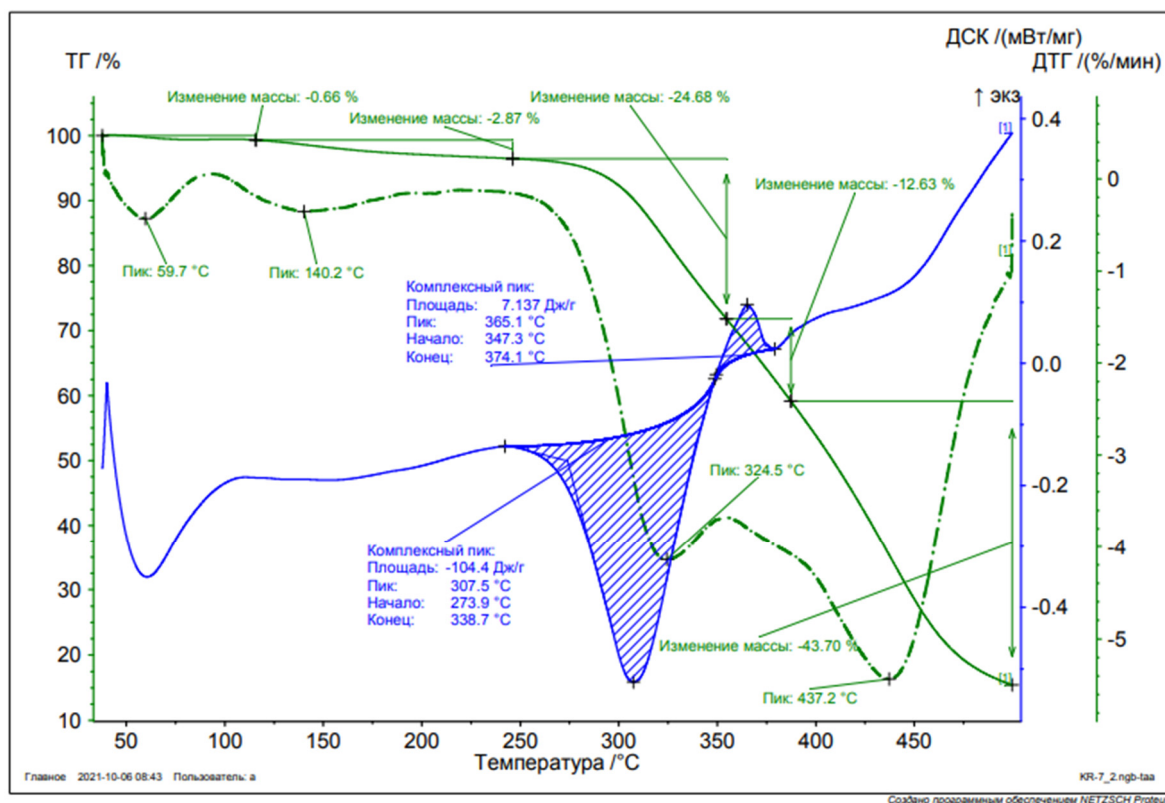

## 9. Morphology and Composition of 3/3Sn, 3/4Sn

### 9.1. Transmission Electron Microscopy

**Figure S35.** TEM image of 3/4S ( $1 \times 10^{-5} \text{M}$ ) in the solvent system THF:  $\text{CH}_3\text{OH}$  (100:1) after the solvent evaporation.

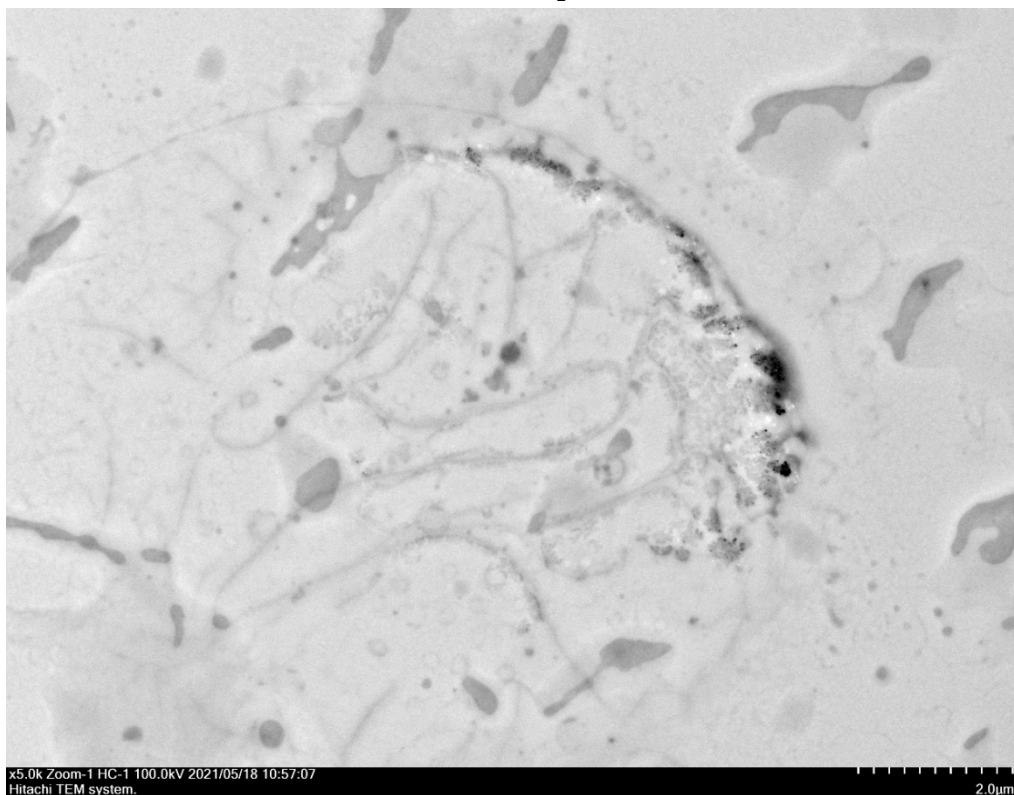

**Figure S36. a-b)** TEM image of 3/4S ( $1 \times 10^{-5} \text{M}$ ) / **moxi** ( $1 \times 10^{-4} \text{M}$ ) in the solvent system THF:  $\text{CH}_3\text{OH}$  (100:1) after the solvent evaporation.

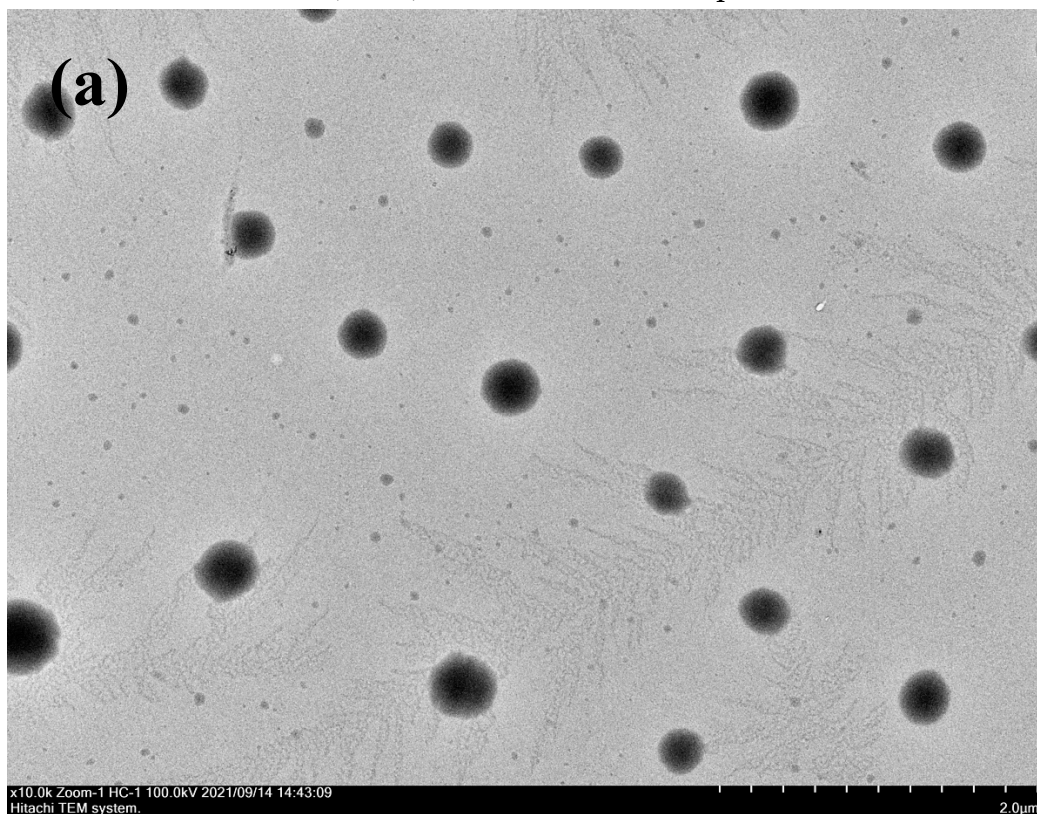



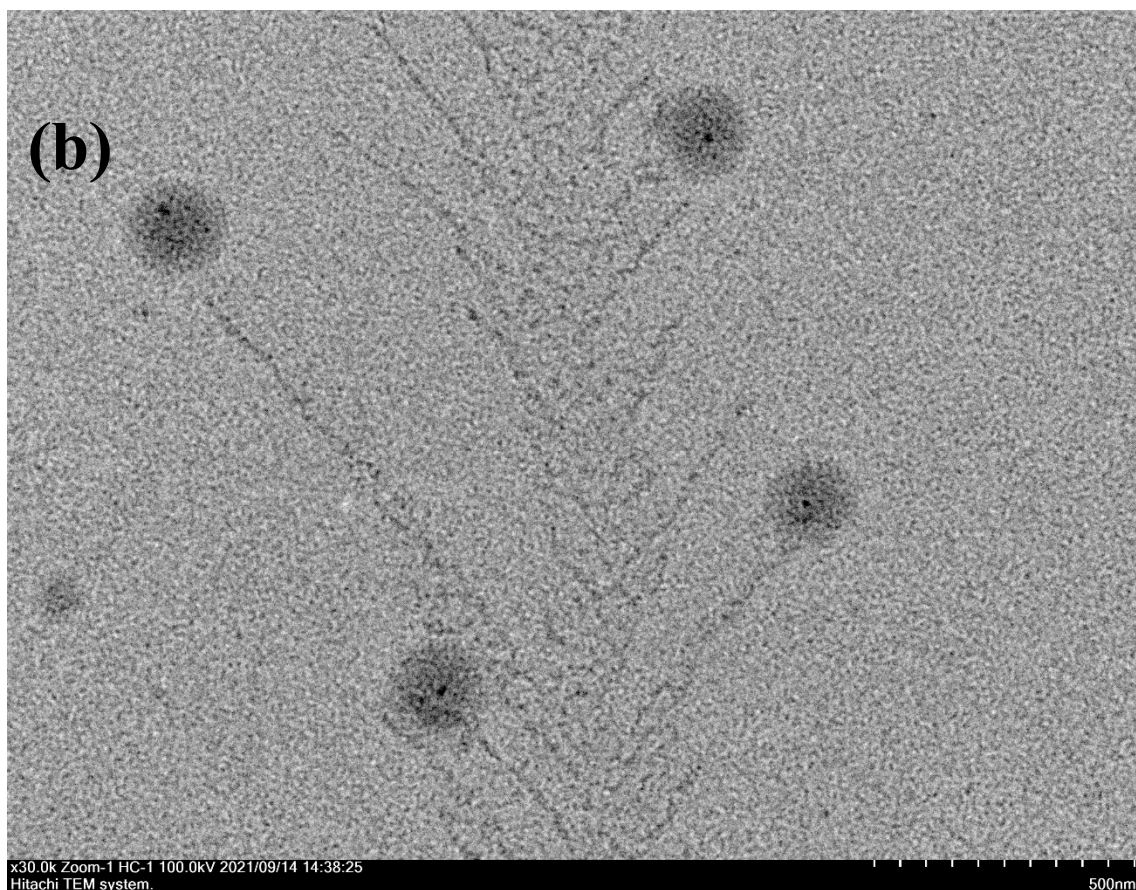

## 9.2. Scanning Electron Microscopy

**Figure S37.** a-b) SEM image of **3/4S** ( $1 \times 10^{-5} \text{M}$ ) in the solvent system THF:  $\text{CH}_3\text{OH}$  (100:1) after the solvent evaporation.

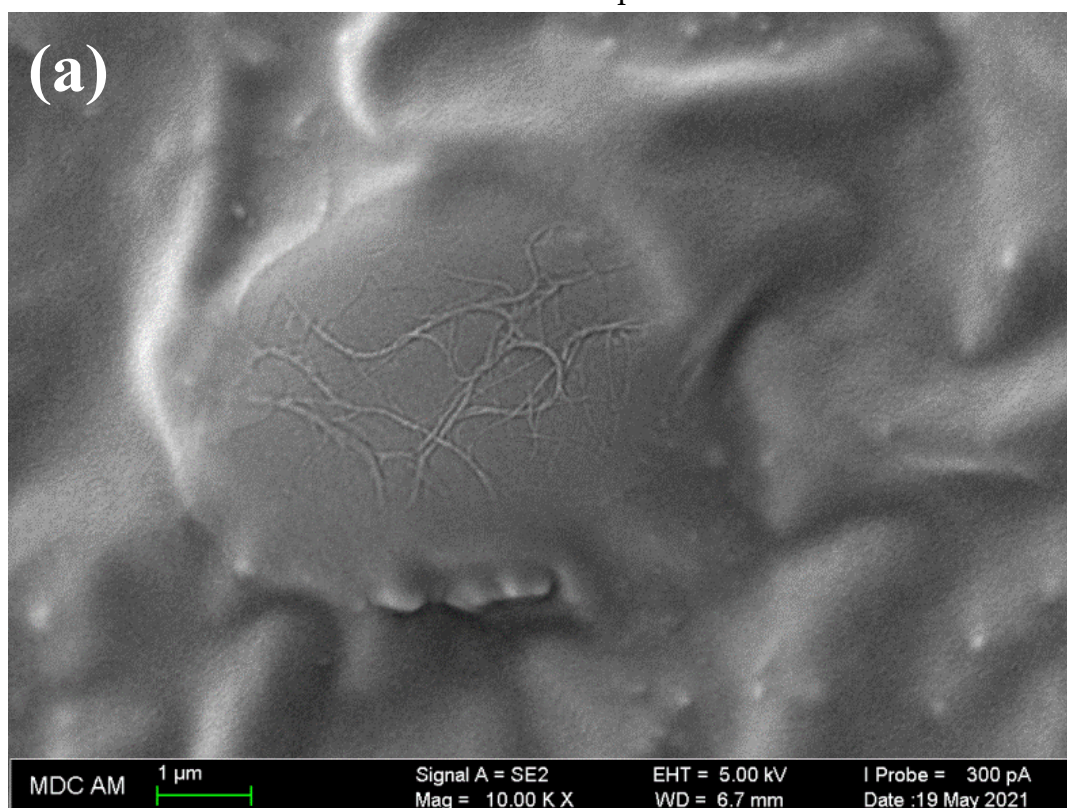



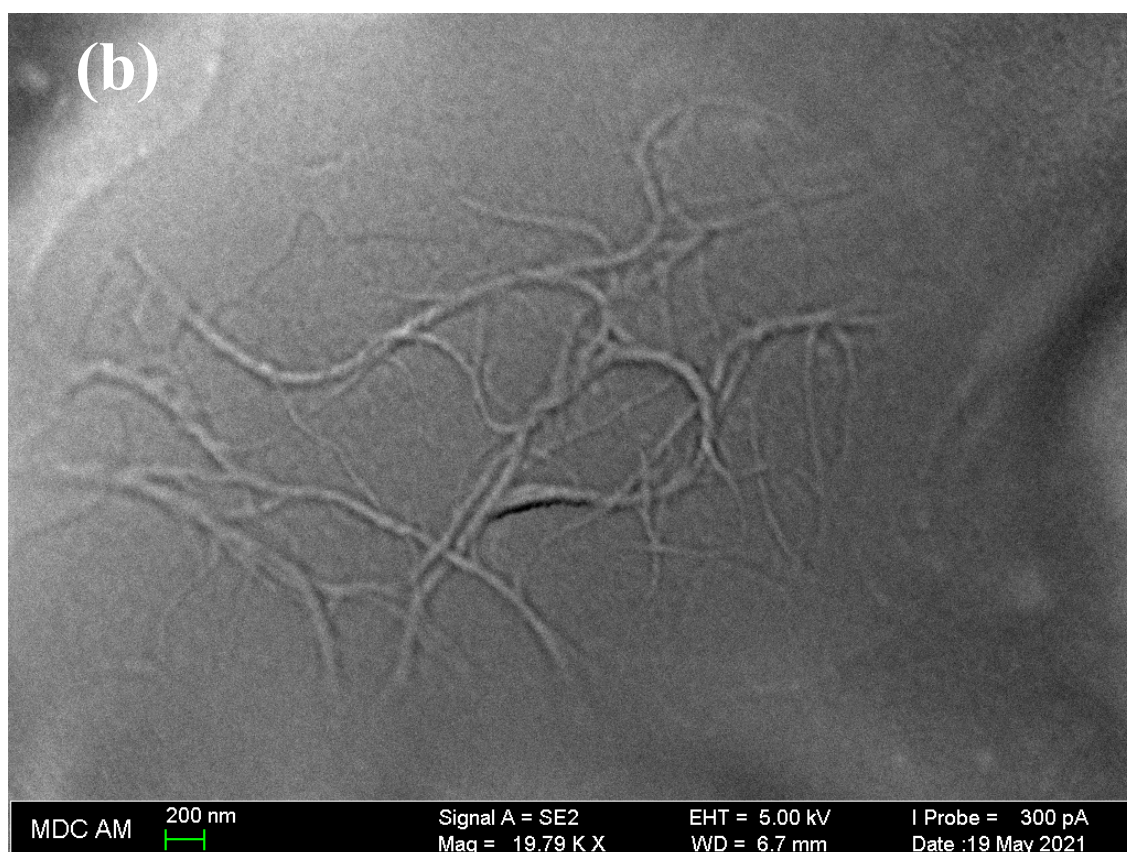

**Figure S38.** SEM image of **3/4S** ( $1 \times 10^{-5} \text{M}$ ) at low pressure in the solvent system THF:  $\text{CH}_3\text{OH}$  (100:1) after the solvent evaporation.

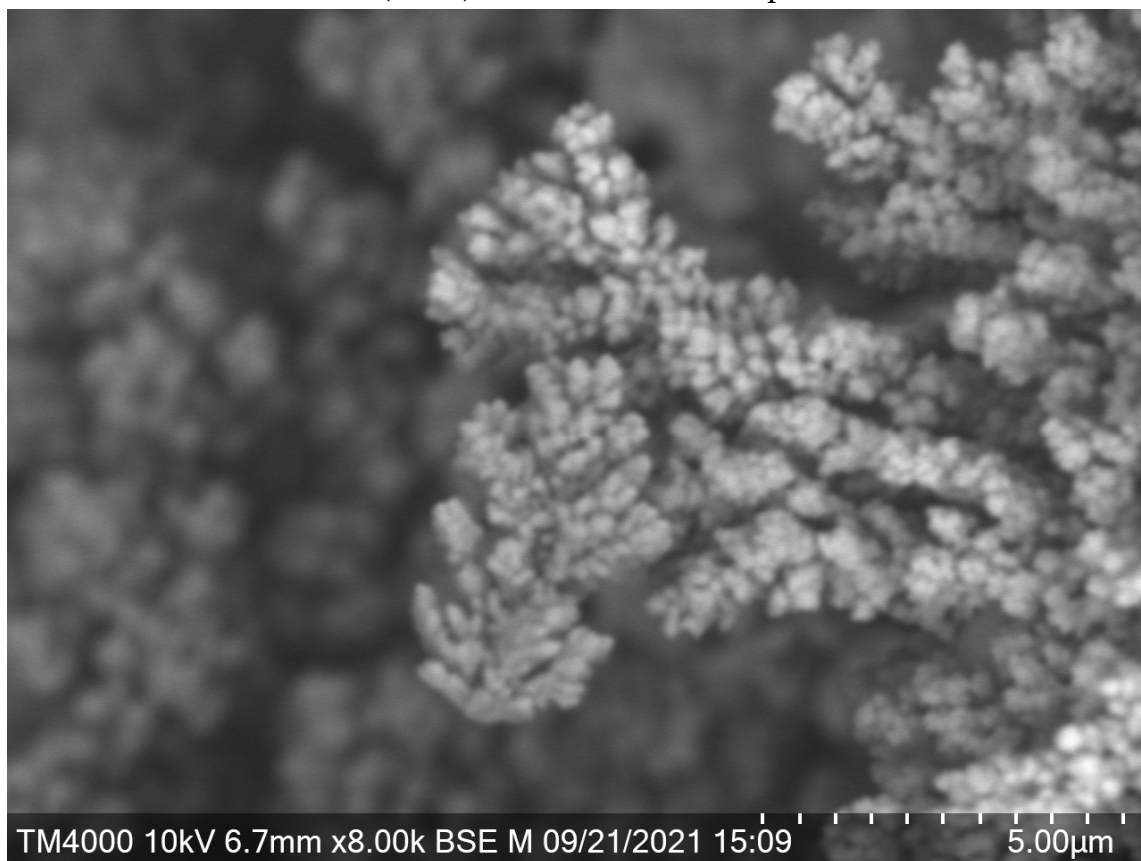

Figure S39. 3D-model of 3/4S ( $1 \times 10^{-5} \text{M}$ ) film from SEM images at low pressure

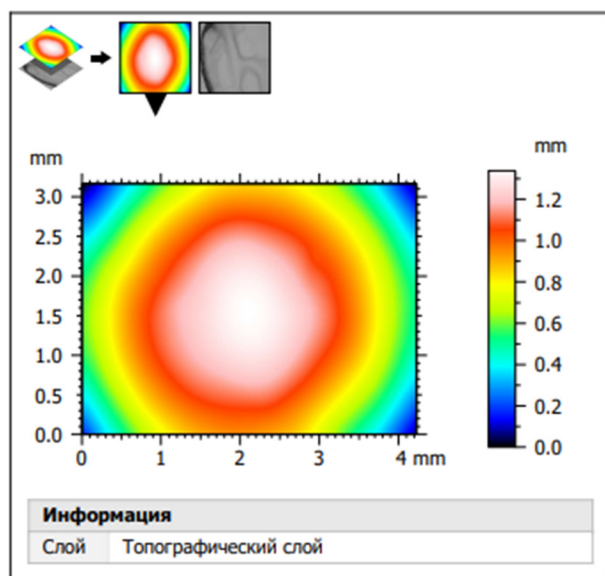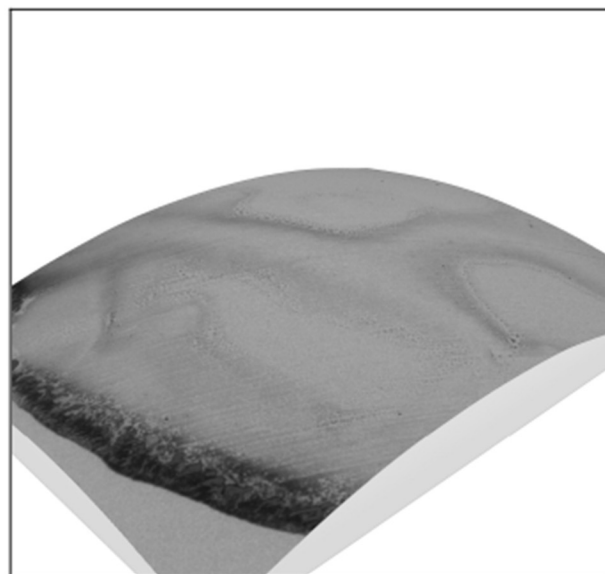

Figure S40. 3D-model of 3/4S ( $1 \times 10^{-5} \text{M}$ ) / **moxi** ( $10^{-4} \text{M}$ ) film from SEM images at low pressure

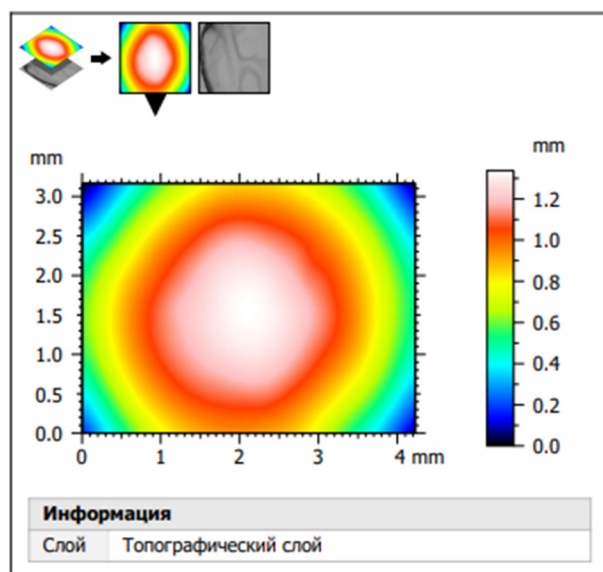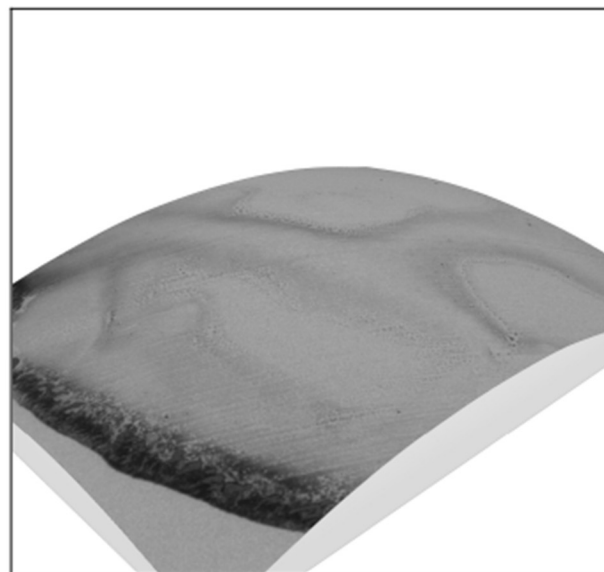

### 9.3 Atomic Force Microscopy

**Figure S41.** AFM image of **3/4S** ( $1 \times 10^{-5} \text{M}$ ) film in the solvent system THF:  $\text{CH}_3\text{OH}$  (100:1) after the solvent evaporation.

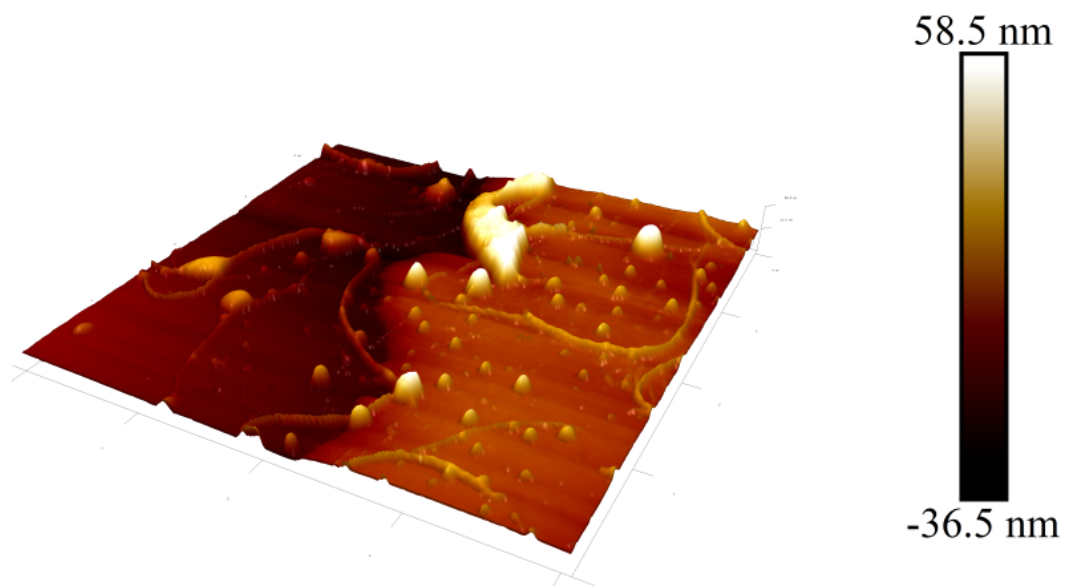

### 9.4 Optical Microscopy

**Figure S42.** Optical microscope of **3/4Sn** film in the solvent system THF:  $\text{CH}_3\text{OH}$  (100:1) after the solvent evaporation with surface disturbance.

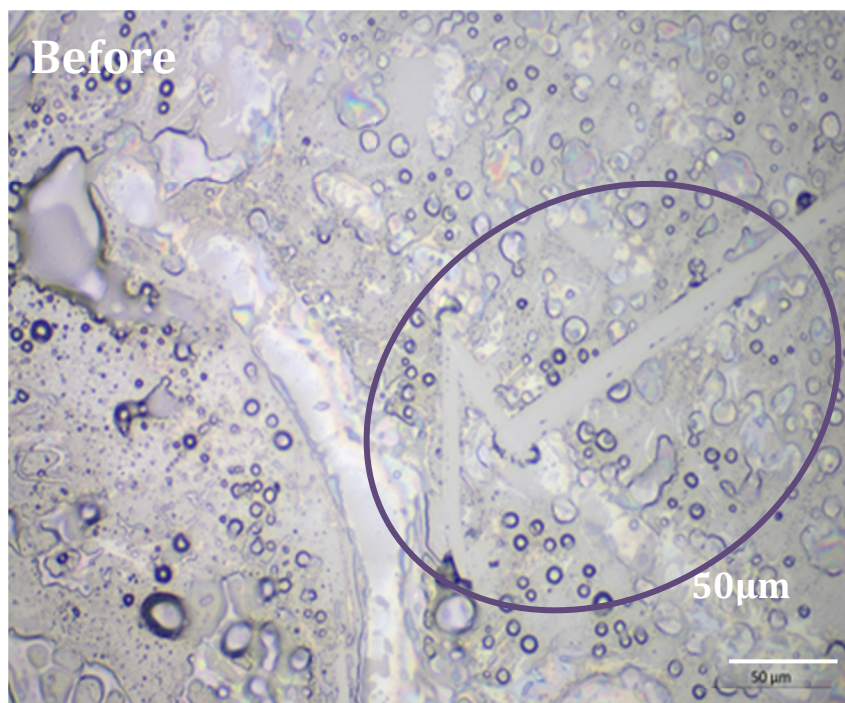



**Figure S43.** Optical microscope of **3/4Sn** film after 120 min during the  $\text{H}_2\text{O}_2$  surface treatment after 120 minutes

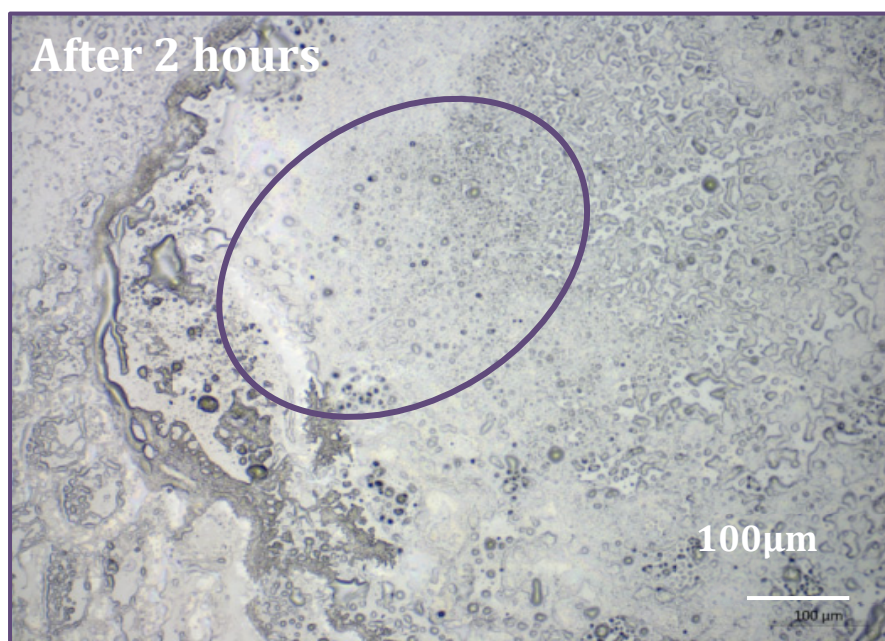

## 10. EPR study

**Figure S44.** EPR spectra of **3n** sample at room temperature in stationary (a) and in pulsed (b) modes of the X-band (9.6 GHz).

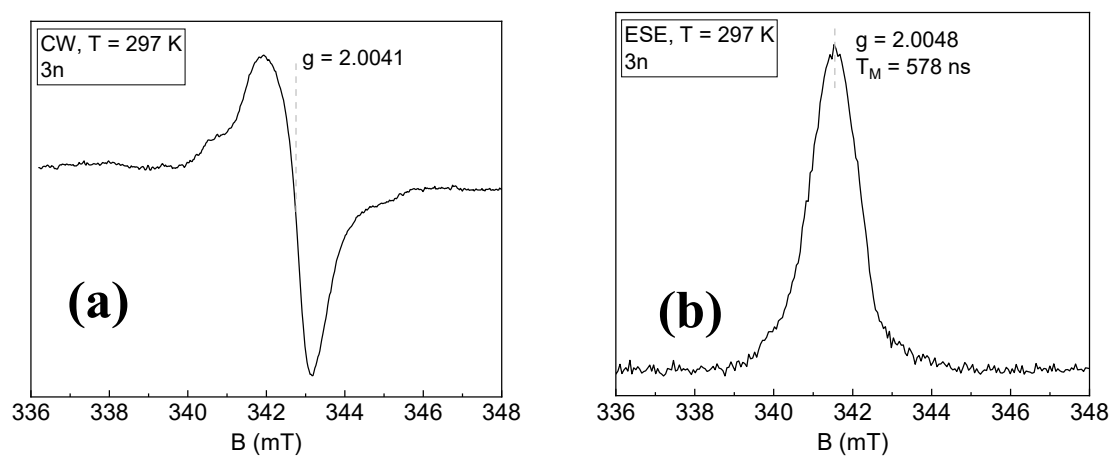

**Figure S45.** EPR spectra of  $3/4\text{Sn}$  film and  $3/3\text{Sn}$  film at room temperature before irradiation with an X-ray source.

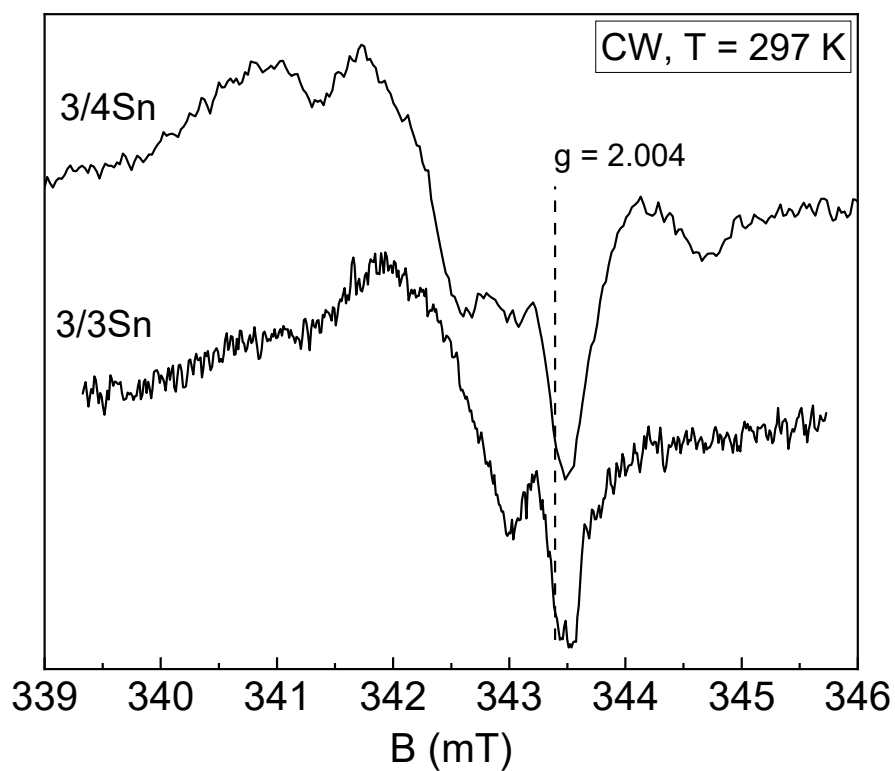

Supplement: s1 [file s1]
